# Supplementary material for: Thermal- and light-induced valence tautomerism with a concerted spin transition in an iron tris(diimine) complex
Source: Royal Society of Chemistry journal article supplement (doi:10.1039/d4sc07798a), 2025-01-01
Supplement: d4sc07798a2.pdf [file d4sc07798a2.pdf]

*Electronic Supplementary Information to accompany:*

# Thermal- and Light-Induced Valence Tautomerism with a Concerted Spin Transition in an Iron Tris(diimine) Complex

*Jett T. Janetzki,<sup>a</sup> Dominic S. Brown,<sup>a</sup> Florian Daumann,<sup>b</sup> I. Haseena Ismail,<sup>a</sup> Robert W.  
Gable,<sup>a</sup> Moya A. Hay,<sup>a</sup> Roger J. Mulder,<sup>c</sup> Alyona A. Starikova,<sup>d</sup> Birgit Weber,<sup>b</sup> Marcus J.  
Giansiracusa,<sup>a</sup> and Colette Boskovic<sup>\*a</sup>*

<sup>a</sup> School of Chemistry, University of Melbourne, Victoria 3010, Australia

<sup>b</sup> Institute for Inorganic and Analytical Chemistry, Friedrich Schiller University Jena,  
Humboldtstraße 8, 07743 Jena, Germany

<sup>c</sup> CSIRO Manufacturing, Clayton, Victoria 3168, Australia

<sup>d</sup> Institute of Physical and Organic Chemistry, Southern Federal University, 344090, Rostov-  
on-Don, Russian Federation

\*c.boskovic@unimelb.edu.au

## Table of Contents

|                                                      |     |
|------------------------------------------------------|-----|
| Experimental and Synthetic Methods .....             | S3  |
| Literature Complexes .....                           | S12 |
| Thermogravimetric Analysis .....                     | S14 |
| Powder X-ray Diffraction .....                       | S15 |
| Structural Data .....                                | S16 |
| Infrared Spectroscopy .....                          | S27 |
| Solid-State Magnetic Data .....                      | S28 |
| Photomagnetic Data .....                             | S31 |
| Density Functional Theory .....                      | S34 |
| UV-Vis-NIR Spectroscopy .....                        | S41 |
| Robin-Day Mixed-Valence Classification Analysis..... | S45 |
| Variable Temperature UV-Vis Spectroscopy .....       | S50 |
| Solution-State Magnetic Measurements .....           | S56 |
| Electrochemistry .....                               | S57 |
| References.....                                      | S58 |

## Experimental and Synthetic Methods

### Synthesis

Manipulations performed under anaerobic conditions were done under a N<sub>2</sub> atmosphere on a Schlenk line or in an M-Braun glove box. Solvents were dried over molecular sieves (3 Å) for a minimum of 3 days and stored under N<sub>2</sub> on sieves until used. Molecular sieves were activated by heating at 300 °C for 48 hours and then cooled under vacuum. Solvents were degassed prior to use via 3 freeze-pump-thaw cycles. All chemicals purchased were of reagent grade or higher and used as received, except Bu<sub>4</sub>NPF<sub>6</sub> and ferrocene which were purified from hot ethanol recrystallization and sublimation, respectively. Ph-BIAN was prepared as previously reported.<sup>1</sup>

**[Zn(Ph-BIAN)<sub>3</sub>](BPh<sub>4</sub>)<sub>2</sub> (1).** In air, a solution of Zn(CH<sub>3</sub>COO)<sub>2</sub>·2H<sub>2</sub>O (0.060 g, 0.27 mmol) in MeOH (5 mL) was added dropwise to a suspension of Ph-BIAN (0.27 g, 0.81 mmol) in MeOH (25 mL), resulting in a clear yellow solution. The reaction was stirred for 1 hour at 60 °C, before filtering. A MeOH (5 mL) solution of NaBPh<sub>4</sub> (0.19 g, 0.56 mmol) was added dropwise, producing a yellow solid. The solid was collected by vacuum filtration, washed with MeOH and Et<sub>2</sub>O and air dried to yield **1** as a yellow solid (0.33 g, 72%). Layering a saturated DCM solution with Et<sub>2</sub>O yielded yellow crystals of **1**·3DCM suitable for X-ray diffraction. The crude product was recrystallized by dissolving 0.2 g in 12 mL DCE, filtering, and layering with 24 mL *i*Pr<sub>2</sub>O, which after one week yielded a crystalline solid, analyzing as **1**·1.5DCE·1.5*i*Pr<sub>2</sub>O. Anal. Calcd for C<sub>132</sub>H<sub>112</sub>N<sub>6</sub>B<sub>2</sub>Cl<sub>3</sub>O<sub>1.5</sub>Zn: C, 79.28; H, 5.65; N, 4.20. Found C, 79.35; H, 6.00; N, 4.09. Selected FT-IR data (ATR, cm<sup>-1</sup>): 1661 (m), 1626 (s), 1583 (s), 1426 (s), 1284 (m), 952 (m), 695 (s), 540 (m). UV-Vis (MeCN) λ<sub>max</sub> (ε): 380 nm (5050 mol<sup>-1</sup> cm<sup>-1</sup>).

**[Co(Ph-BIAN)<sub>3</sub>](BPh<sub>4</sub>)<sub>2</sub> (2).** In air, a solution of CoCl<sub>2</sub>·6H<sub>2</sub>O (0.048 g, 0.20 mmol) in MeOH (5 mL) was added dropwise to a suspension of Ph-BIAN (0.2 g, 0.6 mmol) in MeOH (25 mL). The solution rapidly changed color from orange to red. The reaction was stirred for 1 hour at 60 °C, before filtering. A MeOH (5 mL) solution of NaBPh<sub>4</sub> (0.14 g, 0.41 mmol) was

added dropwise, followed by addition of H<sub>2</sub>O (30 mL), producing a red solid. The solid was collected by vacuum filtration, washed with MeOH and Et<sub>2</sub>O and air dried to yield **2** as an orange solid (0.27 g, 80%). Layering a saturated DCM solution with *i*Pr<sub>2</sub>O yielded dark red block crystals of **2**·DCM·2*i*Pr<sub>2</sub>O suitable for X-ray diffraction. The crude product was recrystallized by dissolving 0.2 g in 12 mL DCE, filtering, and layering with 24 mL *i*Pr<sub>2</sub>O, which after one week yielded a crystalline solid, analyzing as **2**·DCE·1.6*i*Pr<sub>2</sub>O. Anal. Calcd for C<sub>131.6</sub>H<sub>112.4</sub>N<sub>6</sub>B<sub>2</sub>Cl<sub>2</sub>O<sub>1.6</sub>Co: C, 80.85; H, 5.80; N, 4.30. Found C, 80.46; H, 6.19; N, 4.14. Selected FT-IR data (ATR, cm<sup>-1</sup>): 1650 (m), 1620 (s), 1581 (s), 1480 (s), 1421 (m), 1285 (m), 1125 (m), 953 (m), 696 (s), 513 (m). UV-Vis (MeCN) λ<sub>max</sub> (ε): 400 nm (8720 L mol<sup>-1</sup> cm<sup>-1</sup>).

**[Mn(Ph-BIAN)<sub>3</sub>](BPh<sub>4</sub>)<sub>2</sub> (3)**. In air, a solution of MnCl<sub>2</sub>·4H<sub>2</sub>O (0.045 g, 0.23 mmol) in MeOH (5 mL) was added dropwise to a suspension of Ph-BIAN (0.23 g, 0.7 mmol) in MeOH (25 mL). The solution rapidly changed color from orange to red. The reaction was stirred for 1 hour at 60 °C, before filtering. A MeOH (5 mL) solution of NaBPh<sub>4</sub> (0.16 g, 0.47 mmol) was added dropwise, followed by addition of H<sub>2</sub>O (30 mL), to produce a red solid. The solid was collected by vacuum filtration, washed with MeOH and Et<sub>2</sub>O and air dried to yield **3** as an orange solid (0.24 g, 62%). Layering a saturated DCE solution with *i*Pr<sub>2</sub>O yielded dark red block crystals of **3**·1.5*i*Pr<sub>2</sub>O suitable for X-ray diffraction. The crude product was recrystallized by dissolving 0.2 g in 12 mL DCE, filtering, and layering with 24 mL *i*Pr<sub>2</sub>O, which after one week yielded a crystalline solid, analyzing as **3**·0.4*i*Pr<sub>2</sub>O. Anal. Calcd for C<sub>122.4</sub>H<sub>93.6</sub>N<sub>6</sub>B<sub>2</sub>O<sub>0.4</sub>Mn: C, 84.91; H, 5.45; N, 4.85. Found C, 85.30; H, 5.75; N, 4.84. Selected FT-IR data (ATR, cm<sup>-1</sup>): 1653 (m), 1622 (s), 1581 (s), 1480 (s), 1421 (m), 1248 (m), 1117 (m), 951 (m), 834 (s), 696 (s), 511 (m). UV-Vis (MeCN) λ<sub>max</sub> (ε): 400 nm (5700 L mol<sup>-1</sup> cm<sup>-1</sup>).

**[Fe(Ph-BIAN)<sub>3</sub>](BPh<sub>4</sub>)<sub>2</sub> (4)**. Under N<sub>2</sub>, a solution of FeCl<sub>2</sub>·4H<sub>2</sub>O (0.03 g, 0.15 mmol) in MeOH (5 mL) was added dropwise to a suspension of Ph-BIAN (0.15 g, 0.45 mmol) in MeOH (25 mL). The solution rapidly changed color from orange to green. The reaction was

stirred for 1 hour at 60 °C, before filtering. A MeOH (5 mL) solution of NaBPh<sub>4</sub> (0.1 g, 0.3 mmol) was added dropwise to produce a green solid. The suspension was then left at -18 °C for 24 hours. The precipitate was collected by vacuum filtration in air, washed with MeOH and Et<sub>2</sub>O and air dried to yield **3** as green solid (0.21 g, 84%). Layering a saturated MeCN solution with *i*Pr<sub>2</sub>O under N<sub>2</sub> yielded dark green crystals of **4**·2*i*Pr<sub>2</sub>O suitable for X-ray diffraction. The crude product was recrystallized under N<sub>2</sub> by dissolving 0.2 g in 12 mL MeCN, filtering, and layering with 24 mL *i*Pr<sub>2</sub>O, which after one week yielded a crystalline solid, analyzing as **4**·1.7*i*Pr<sub>2</sub>O. Anal. Calcd for C<sub>130.2</sub>H<sub>111.8</sub>N<sub>6</sub>B<sub>2</sub>O<sub>1.7</sub>Fe: C, 83.84; H, 6.04; N, 4.51. Found C, 84.18; H, 6.42; N, 4.64. Selected FT-IR data (ATR, cm<sup>-1</sup>): 3054 (w), 2982 (w), 1753 (w), 1621 (m), 1581 (s), 1484 (s), 1418 (m), 1300 (m), 1051 (m), 830 (s), 699 (vs), 540 (s). UV-Vis (MeCN) λ<sub>max</sub> (ε): 690 nm (12,000 L mol<sup>-1</sup> cm<sup>-1</sup>).

### **X-ray Data Collection and Structure Solution**

Single X-ray diffraction data for **1**·3DCM and **3**·1.5*i*Pr<sub>2</sub>O were collected using a Rigaku XtaLAB Synergy X-ray Diffractometer System using Cu Kα (λ = 1.5418 Å), while data for **2**·DCM·2*i*Pr<sub>2</sub>O and **4**·2*i*Pr<sub>2</sub>O were collected at the Australian Synchrotron MX2<sup>2</sup> and MX1<sup>3</sup> beamlines, respectively, tuned to approximate Mo-Kα radiation (λ = 0.71075 Å, MX1; λ = 0.71076 Å, MX2) fitted with a silicon double crystal monochromator. Data reduction for **1**·3DCM and **3**·1.5*i*Pr<sub>2</sub>O was carried out using CrysAlisPro,<sup>4</sup> using gaussian absorption corrections while data reduction for **2**·DCM·2*i*Pr<sub>2</sub>O and **4**·2*i*Pr<sub>2</sub>O was performed using XDS, using medium multi-scan absorption correction in SADABS. Crystals of **4**·2*i*Pr<sub>2</sub>O were collected at multiple orientations and merged with SADABS.<sup>5</sup> Crystals were transferred directly from the mother liquor to crystallographic oil to prevent solvent loss and loss of crystallinity. All structures were solved with SHELXT<sup>6</sup> and refined using a full matrix least squared procedure based on *F*<sup>2</sup> using SHELXL within Olex2.<sup>7,8</sup> The solvent molecules in **1**·3DCM, **2**·DCM·2*i*Pr<sub>2</sub>O, **3**·1.5*i*Pr<sub>2</sub>O and **4**·2*i*Pr<sub>2</sub>O were highly disordered and attempts to

satisfactorily model the disorder were unsuccessful. Accordingly, the contribution of the solvent molecules to the structure was treated with the solvent mask routine<sup>9</sup> in Olex2, with the composition of the solvent molecules assigned based on the residual electron density and the volume of the solvent void. One BPh<sub>4</sub><sup>-</sup> anion in **3**·1.5tPr<sub>2</sub>O was refined over two different orientations. All non-hydrogen atoms were refined using anisotropic displacement factors. Hydrogen atoms were placed at geometrical positions and refined using the riding model.

Powder X-ray diffraction (PXRD) data were measured on a Rigaku Synergy Dual Wavelength Rotating Anode X-ray Diffractometer System using Cu-K $\alpha$  ( $\lambda = 1.5418 \text{ \AA}$ ) at 100 K. Powder samples were prepared by crushing the sample gently and loading them into a borosilicate glass capillary for measurement. Data were collected at  $2\theta = 50^\circ$  with an exposure time of 60 seconds per frame and processed using CrysAlisPro.<sup>4</sup>

### **Infrared and UV-Vis-NIR Spectroscopy**

Attenuated total reflectance infrared spectra were measured on a Bruker Alpha spectrometer and normalized as absorbance spectra. Samples for solution UV-Visible-NIR measurements were prepared in an M-Braun N<sub>2</sub>-atmosphere glove box and placed in a gastight cuvette. Solution state UV-Visible-NIR spectra were measured on a PerkinElmer UV-Vis-NIR Spectrometer Lambda 1050. Solution state variable-temperature UV-visible absorption spectra were measured on an Agilent Cary UV-visible Multicell Peltier Spectrometer, with a flow of N<sub>2</sub> gas to remove condensation. Diffuse reflectance UV-Visible spectra were measured on the samples diluted ~5% in KBr on a Thermo Scientific Evolution 220 UV-Visible spectrophotometer. The NIR spectrum of the [Co<sup>II</sup>((Ph-BIAN<sup>•-</sup>)(Ph-BIAN<sup>0</sup>)<sub>2</sub>)<sup>+</sup> state of **2** in DCM and MeCN was previously reported,<sup>10</sup> generated electrochemically in a transmission cell of Hartl design fitted with CaF<sub>2</sub> windows and controlled by the EmStat<sup>3+</sup> from solutions of the analyte in 0.1 M NBu<sub>4</sub>PF<sub>6</sub> and recorded on a Cary 5000 UV-Vis-NIR spectrometer.

## Mössbauer Spectroscopy

Zero-field  $^{57}\text{Fe}$  Mössbauer spectra were recorded in transmission geometry in constant acceleration mode on WissEl (Wissenschaftliche Elektronik GmbH) spectrometers, equipped with a  $^{57}\text{Co}(\text{Rh})$  source (Ritverc JSC) having a nominal activity of 50 mCi and a 10 mm active window (sealed by Be) that is kept at room temperature. The polycrystalline material was filled into polyetheretherketone (PEEK) containers, and PTFE-made disks were used to ensure homogeneous distribution of the sample within the containment. For low temperature spectra, the sample holder was mounted onto a copper block and inserted into a static exchange gas cryostat (CRYO Industries of America, Inc.) which is connected to a temperature controller from Lake Shore Cryotronics, Inc. Data acquisition at 300 K and above were conducted by filling the polycrystalline material into a boron nitride disk (WissEl) with an inner diameter of 13 mm which was fixated in a stainless steel holder and placed in a MBF-1100 furnace (WissEl) consisting of a quartz tube sealed by a mylar window (outer window) and a 0.15 mm thick aluminum foil as the inner heat screen on each side. The temperature was measured by a Chromel<sup>®</sup>-Alumel<sup>®</sup> thermocouple at the sample holder ensuring a temperature gradient of the sample of <5%. Precise temperature control ( $\pm 0.1$  °C) is ensured via a temperature control unit from J-Kem Scientific (Model 410A). Incoming signals were detected with a proportional counter and cached in a multichannel analyzer (CMCA-550, operating in 512 channels). Counts were transferred to the Wissoft 2003<sup>11</sup> interface on a computer. Isomer shifts are reported relative to  $\alpha$ -iron foil at 298 K (without correction in terms of the second-order Doppler shift). Suitable fit models were obtained using the Recoil software package.<sup>12</sup>

## Solid-State Magnetic Measurements

The dc susceptibility and magnetization measurements for samples  $2\cdot\text{DCE}\cdot 1.6i\text{Pr}_2\text{O}$ ,  $3\cdot 0.4i\text{Pr}_2\text{O}$  and  $4\cdot 1.7i\text{Pr}_2\text{O}$  were performed on a Quantum Design MPMS3 SQUID

magnetometer measured with an applied field of 1000 Oe. Compounds **2**·DCE·1.6*i*Pr<sub>2</sub>O and **3**·0.4*i*Pr<sub>2</sub>O were loaded into a gel cap (**2**·DCE·1.6*i*Pr<sub>2</sub>O was restrained in eicosane) and measured between 1.8 and 300 K. Compound **4**·1.7*i*Pr<sub>2</sub>O was loaded into a plastic cap and measured between 1.8 and 400 K. Measurements employed scan rates of 2 K/min for 20–400 K, 1 K/min for 10–19 K, and 0.5 K/min for 1.8–9 K. The data was corrected for the diamagnetic contribution of the plastic/gel cap, eicosane and of the sample using half the molar mass. Compound **4**·1.7*i*Pr<sub>2</sub>O was measured from 300 to 1.8 K, before measuring to 400 K, followed by measurement to 1.8 K, followed by measurement to 400 K. Magnetization (M) vs field (H) measurements were performed between 0 and 7 T at 1.8, 4 and 7 K.

### Photomagnetic Measurements

Photomagnetic measurements of **4**·1.7*i*Pr<sub>2</sub>O were performed on a Quantum Design MPMS3 SQUID magnetometer, coupled to a TLS120Xe High Power Tuneable Light Source (280 – 1100 nm). Sample irradiation at UV-Vis wavelengths were performed using the UV-Vis fibre optic sample holder (FOSH) and fibre optic bundle. Sample irradiation at Vis-NIR wavelengths were performed using the Vis-NIR FOSH and fibre optic bundle. All photomagnetic measurements were performed in the DC scan mode, utilizing MultiView's Magneto-Optic option. The following parameters were used in the DC scan: 40 mm length in six seconds with one scan per measurement. The DC scans measured on warming followed photoirradiation employed a scan rate of 0.3 K min<sup>-1</sup> across the full warming range (10–300 K). All measurements were performed in a 1 T field, with a center offset of 66.54 mm, and utilized a fixed range (1 V). All background scans were fitted with a power law, and the resulting fit used for the background subtraction:

$$0.000268531356291217 \cdot T^{-0.886570574983035} - 4 \times 10^{-5} \quad (\text{eq. S1})$$



where  $T$  is temperature. The diamagnetic contribution of  $4 \cdot 1.7iPr_2O$  was calculated as half the molar mass and subtracted from the background corrected magnetic susceptibility data. Compound  $4 \cdot 1.7iPr_2O$  (0.8 mg) was loaded into the UV-vis FOSH and irradiated with 420 nm light (bandwidth 19.2 nm) at 10 K for 12 hours. A background subtraction was performed by measuring the signal from the empty UV-vis FOSH in a 1 T field.

### Solution-Based Magnetic Measurements

Solution-based magnetic susceptibility measurements were measured in MeCN for **2**, **3** and **4** by  $^1H$  NMR spectroscopy according to Evans method.<sup>13</sup> Solution samples for **2** and **3** were prepared aerobically. The solution sample for **4** were prepared in an M-Braun  $N_2$ -atmosphere glove box and measured in an anaerobic NMR tube equipped with a J Young valve. A solvent mixture was prepared containing  $d_3$ -MeCN and 0.5–2%  $H_3$ -MeCN as a standard. Compounds **2**, **3** and **4** were dissolved in the solvent mixture to form a solution of precisely known concentration and placed inside an NMR tube. A narrow capillary was filled with the same solvent mixture and placed inside the NMR tube as an internal reference. Measurements for **2** and **3** were recorded at room temperature on a Bruker Ascend 400 NMR spectrometer. Measurements for **4** were recorded between 238–328 K on a Bruker Av500 NMR spectrometer equipped with a 5 mm TCI CryoProbe Prodigy  $^1H/^2H-^{13}C-^{15}N$  probe. Cooling was achieved with a Bruker BCU-II gas pre-conditioner. Sample temperature was calibrated using  $d_4$ -methanol and stable at  $\pm 0.1$  K. The shift in the  $H_3$ -MeCN singlet in the paramagnetic solution compared to  $H_3$ -MeCN in the internal references,  $\Delta\nu$  in hertz, can be used to calculate the mass susceptibility of the compound,  $\chi_g$ :

$$\chi_g = \frac{3\Delta\nu}{4\pi m\nu} + \chi_0 + \chi_0 \frac{d_0 - d_s}{m} \quad (\text{eq. S2})$$

where  $m$  is the concentration of the paramagnetic solution (in  $g\ cm^{-3}$ ), corrected for the temperature dependence of the density of the solvent,<sup>14,15</sup>  $\nu$  is the spectrometer frequency (in

Hz),  $\chi_0$  is the mass susceptibility of the solvent mixture,  $d_0$  is the density of the pure solvent mixture, and  $d_s$  is the density of the compound solution. As the sample solution is dilute, the following approximation can be made:  $d_s = d_0 + m$ , leading to a cancelation of the second and third terms of eq. S3. The mass susceptibility is converted to the molar susceptibility by multiplying by the molecular weight (including molecules of solvation) and then corrected for the diamagnetic contribution of the compound using Pascal's constants.<sup>16</sup>

The  $T_{1/2}$ ,  $\Delta H$  and  $\Delta S$  for **4** in MeCN were obtained by fitting  $\chi_{MT}$  vs  $T$  data with the regular solution model:

$$\chi_{MT} = (\chi_{MT})_{min} + \frac{(\chi_{MT})_{max} - (\chi_{MT})_{min}}{1 + e^{\frac{\Delta S}{R} \left( \frac{T_1}{T} - 1 \right)}} \quad (\text{eq. S3})$$

where  $(\chi_{MT})_{min}$  and  $(\chi_{MT})_{max}$  are the minimum and maximum values of  $\chi_{MT}$  respectively, and  $R$  is the ideal gas constant with a value of  $8.314 \text{ J K}^{-1} \text{ mol}^{-1}$ .

## Electrochemistry

Electrochemical measurements were performed in MeCN at room temperature using a standard three-electrode configuration connected to an eDAQ computer-controlled potentiostat. Measurements were performed under a constant flow of  $\text{N}_2$ . For cyclic voltammetry measurements, the three-electrode system consisted of a 1.0 mm diameter glassy carbon electrode (Cypress Systems), a platinum/titanium auxiliary electrode (eDAQ), and a Ag/AgCl reference electrode (eDAQ). For steady state voltammetry measurements, the working electrode was replaced with a 3.0 mm diameter glassy carbon rotating disk electrode with external controller (Metrohm). Analyte solutions of 1.0 mM were prepared using anaerobic techniques in 5 ml MeCN containing 0.25 M  $\text{Bu}_4\text{NPF}_6$  as the supporting electrolyte. All potentials have been referenced *versus* the ferrocene/ferrocenium redox couple, measured immediately afterwards. The cyclic voltammetry (CV) midpoint potentials ( $E_m$ ) are calculated

by taking the average of the peak anodic potential ( $E_{pa}$ ) and peak cathodic potential ( $E_{pc}$ ). The peak-to-peak separation ( $\Delta E_p$ ) for a reversible process is calculated the difference of  $E_{pa}$  and  $E_{pc}$ . The  $\Delta E_p$  values are close to the value measured under the same conditions for ferrocene at a scan rate of  $100 \text{ mV s}^{-1}$  (65–70 mV in MeCN). The half-wave potentials ( $E_{1/2}$ ) are calculated as the potential at half the limiting current ( $i_L$ ).

### **Elemental Analysis, Thermogravimetric Analysis**

Elemental analyses (C, H, N) were performed at the Macquarie Analytical and Fabrication Facility, Macquarie University. Thermogravimetric analyses were performed on a Perkin Elmer TGA 8000 thermogravimetry analyzer using a ramp rate of  $5 \text{ }^\circ\text{C}$  per minute from  $30 \text{ }^\circ\text{C}$  up to a maximum temperature of  $400 \text{ }^\circ\text{C}$  under an  $\text{N}_2$  atmosphere.

### **Density Functional Theory Calculations**

Density functional theory (DFT) calculations were performed for the cationic complexes of **2**, **3** and **4** in the gas phase to study the relative energy of the different electronic states. The electronic energies ( $E$ ,  $\text{kcal mol}^{-1}$ ) were calculated using the UTPSSh/6-311++G(d,p)<sup>17,18</sup> DFT method, which has been successful in modelling VT and SCO,<sup>19–22</sup> including Co-Ar-BIAN VT.<sup>10</sup> As UTPSSh/6-311++G(d,p) can over stabilize LS-Fe(III/II)-containing species,<sup>20,23</sup> **4** was also calculated with UOPBE/6-311++G(d,p).<sup>22,24–27</sup> Calculations were performed on the cationic complex excluding the  $\text{BPh}_4^-$  anions to streamline computational time. The stationary points on the potential energy surface were located by full geometry optimization with subsequent confirmation of the stabilities of the DFT wave function and calculation of force constant matrices. The atomic coordinates obtained from experimental crystal structures of **2**, **3** and **4** were used as input files, excluding the counterions.

## Literature Complexes

**Chart S1.** Representation of iron VT compounds listed in Table 1. For compounds [Fe(porphyrin)(thiolate)], the four porphyrin/thiolate ligands are shown beside the complex.

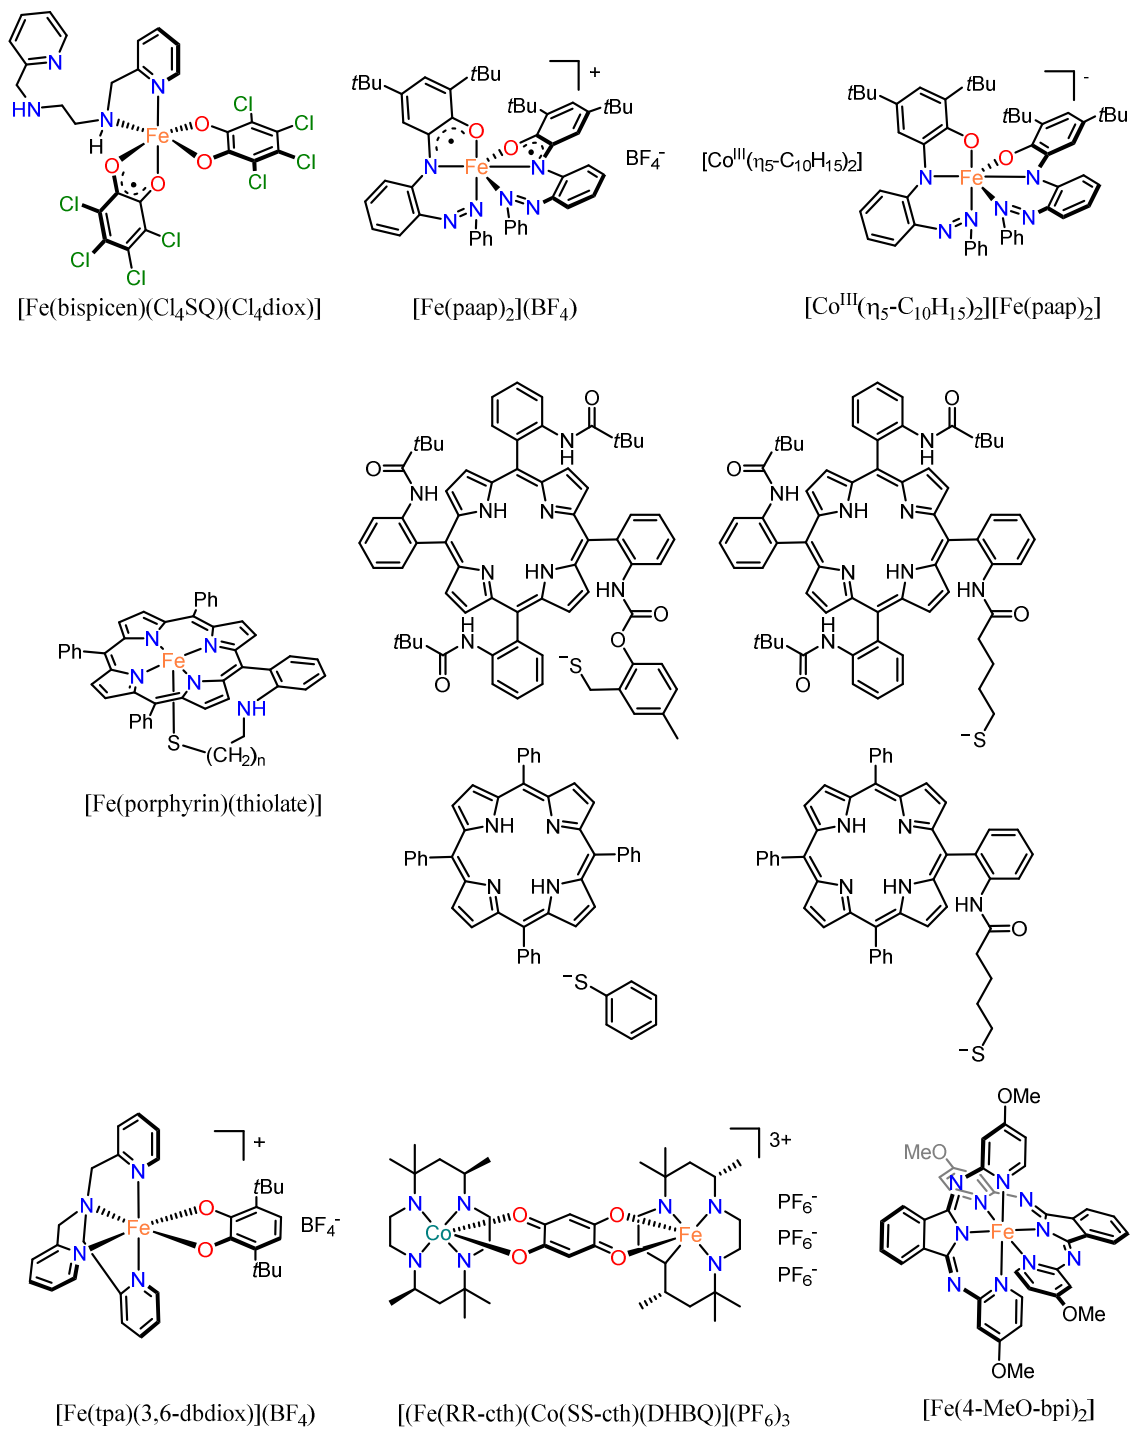

**Chart S2.** Valence tautomeric equilibrium displayed by  $[\text{Co}(4\text{-MeO-BIAN})_3]$  in solution.

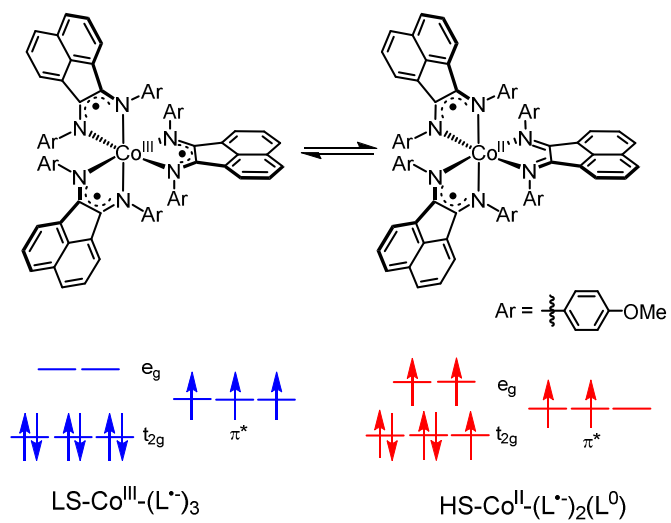

## Thermogravimetric Analysis

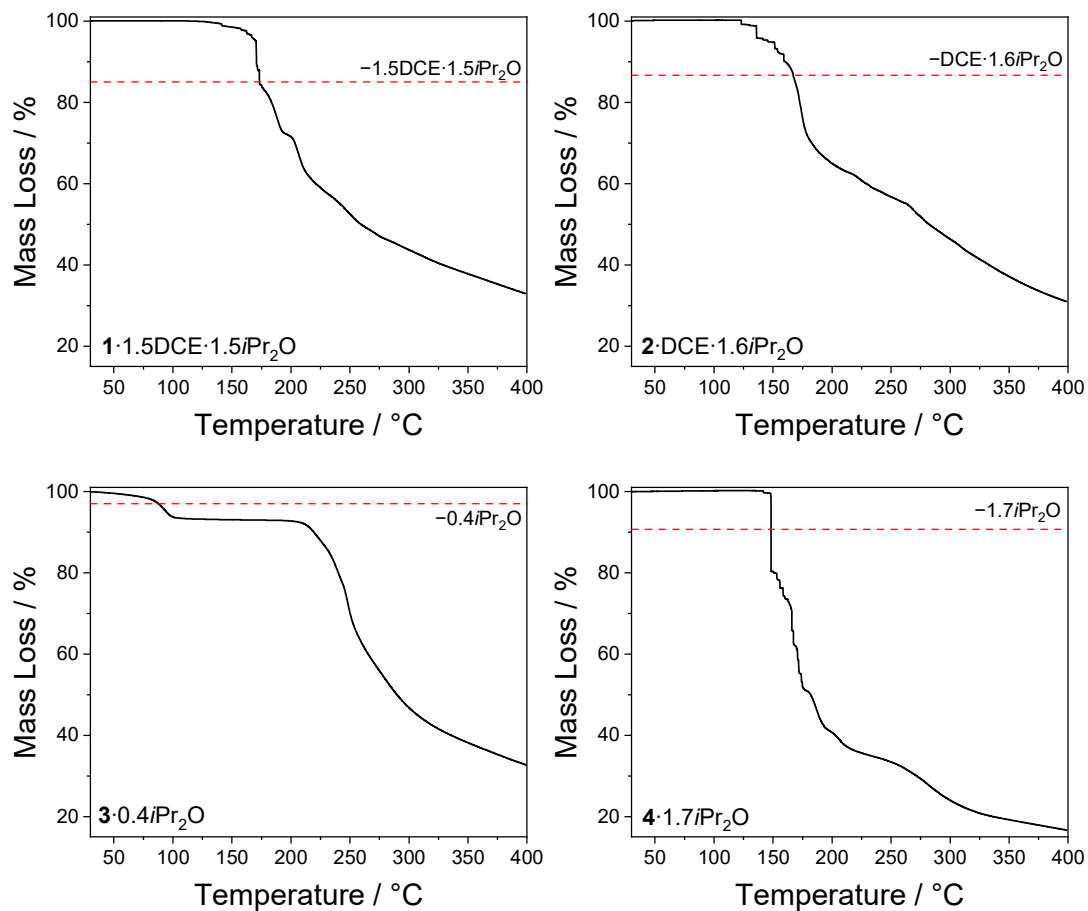

**Figure S1.** Thermogravimetric profile for  $1 \cdot 1.5\text{DCE} \cdot 1.5i\text{Pr}_2\text{O}$ ,  $2 \cdot \text{DCE} \cdot 1.6i\text{Pr}_2\text{O}$ ,  $3 \cdot 0.4i\text{Pr}_2\text{O}$  and  $4 \cdot 1.7i\text{Pr}_2\text{O}$  under  $\text{N}_2$  at a ramp rate of  $5\text{ }^\circ\text{C min}^{-1}$ .

## Powder X-ray Diffraction

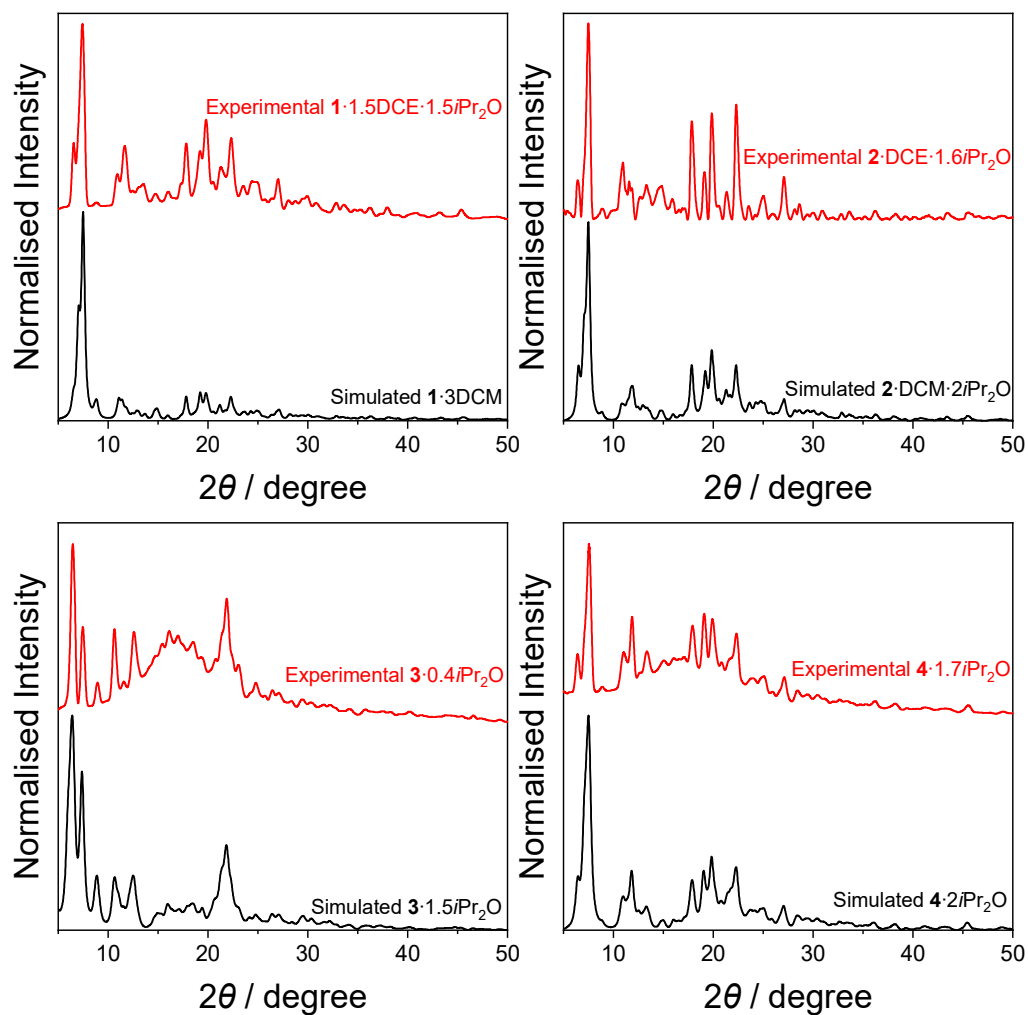

**Figure S2.** Top left: Experimental PXRD pattern of  $1 \cdot 1.5\text{DCE} \cdot 1.5i\text{Pr}_2\text{O}$  at 100 K (red) and simulated PXRD pattern from crystal structure of  $1 \cdot 3\text{DCM}$  at 100 K (black). Top right: Experimental PXRD pattern of  $2 \cdot \text{DCE} \cdot 1.6i\text{Pr}_2\text{O}$  at 100 K (red) and simulated PXRD pattern from crystal structure of  $2 \cdot \text{DCM} \cdot 2i\text{Pr}_2\text{O}$  at 100 K (black). Bottom left: Experimental PXRD pattern of  $3 \cdot 0.4i\text{Pr}_2\text{O}$  at 100 K (red) and simulated PXRD pattern from crystal structure of  $3 \cdot 1.5i\text{Pr}_2\text{O}$  at 100 K (black). Bottom right: Experimental PXRD pattern of  $4 \cdot 1.7i\text{Pr}_2\text{O}$  at 100 K (red) and simulated PXRD pattern from crystal structure of  $4 \cdot 2i\text{Pr}_2\text{O}$  at 100 K (black).

## Structural Data

**Table S1.** Crystallographic data and structure refinement parameters for compound **1**·3DCM, **2**·DCM·2*i*Pr<sub>2</sub>O and **3**·1.5*i*Pr<sub>2</sub>O at 100 K.

|                                                              | <b>1</b> ·3DCM                                                                    | <b>2</b> ·DCM·2 <i>i</i> Pr <sub>2</sub> O                                                       | <b>3</b> ·1.5 <i>i</i> Pr <sub>2</sub> O                                           |
|--------------------------------------------------------------|-----------------------------------------------------------------------------------|--------------------------------------------------------------------------------------------------|------------------------------------------------------------------------------------|
| Empirical formula                                            | C <sub>123</sub> H <sub>94</sub> B <sub>2</sub> Cl <sub>6</sub> N <sub>6</sub> Zn | C <sub>133</sub> H <sub>118</sub> B <sub>2</sub> Cl <sub>2</sub> CoN <sub>6</sub> O <sub>2</sub> | C <sub>129</sub> H <sub>109</sub> B <sub>2</sub> MnN <sub>6</sub> O <sub>1.5</sub> |
| Formula weight                                               | 1955.73                                                                           | 1983.78                                                                                          | 1843.78                                                                            |
| Temperature (K)                                              | 100.00(10)                                                                        | 100.00(2)                                                                                        | 100.00(11)                                                                         |
| Crystal system                                               | monoclinic                                                                        | monoclinic                                                                                       | triclinic                                                                          |
| Space group                                                  | C2/c                                                                              | C2/c                                                                                             | <i>P</i> $\bar{1}$                                                                 |
| <i>a</i> (Å)                                                 | 27.5951(2)                                                                        | 27.429(6)                                                                                        | 17.0314(2)                                                                         |
| <i>b</i> (Å)                                                 | 13.48310(10)                                                                      | 13.479(3)                                                                                        | 17.0463(3)                                                                         |
| <i>c</i> (Å)                                                 | 29.7605(2)                                                                        | 29.817(6)                                                                                        | 21.0901(2)                                                                         |
| $\alpha$ (°)                                                 | 90                                                                                | 90                                                                                               | 80.9160(10)                                                                        |
| $\beta$ (°)                                                  | 114.5370(10)                                                                      | 114.30(3)                                                                                        | 69.6040(10)                                                                        |
| $\gamma$ (°)                                                 | 90                                                                                | 90                                                                                               | 60.143(2)                                                                          |
| Volume (Å <sup>3</sup> )                                     | 10072.95(14)                                                                      | 10047(4)                                                                                         | 4976.40(15)                                                                        |
| <i>Z</i>                                                     | 4                                                                                 | 4                                                                                                | 2                                                                                  |
| $\rho_{\text{calc}}$ (g/cm <sup>3</sup> )                    | 1.290                                                                             | 1.311                                                                                            | 1.230                                                                              |
| $\mu$ (mm <sup>-1</sup> )                                    | 2.223                                                                             | 0.285                                                                                            | 1.521                                                                              |
| <i>F</i> (000)                                               | 4064.0                                                                            | 4180.0                                                                                           | 1944.0                                                                             |
| Crystal size (mm <sup>3</sup> )                              | 0.255 × 0.193 × 0.125                                                             | 0.27 × 0.2 × 0.13                                                                                | 0.732 × 0.301 × 0.022                                                              |
| Radiation                                                    | Cu K $\alpha$ ( $\lambda$ = 1.54184)                                              | Synchrotron ( $\lambda$ = 0.71076)                                                               | Cu K $\alpha$ ( $\lambda$ = 1.54184)                                               |
| 2 $\theta$ range for data collection (°)                     | 7.352 to 156.134                                                                  | 3.258 to 64.872                                                                                  | 5.98 to 160.902                                                                    |
| Index ranges                                                 | -32 ≤ <i>h</i> ≤ 34, -17 ≤ <i>k</i> ≤ 16, -37 ≤ <i>l</i> ≤ 35                     | -40 ≤ <i>h</i> ≤ 40, -19 ≤ <i>k</i> ≤ 19, -37 ≤ <i>l</i> ≤ 38                                    | -21 ≤ <i>h</i> ≤ 21, -21 ≤ <i>k</i> ≤ 21, -16 ≤ <i>l</i> ≤ 26                      |
| Reflections collected                                        | 68269                                                                             | 104807                                                                                           | 96120                                                                              |
| Independent reflections                                      | 10656 [R <sub>int</sub> = 0.0310, R <sub>sigma</sub> = 0.0199]                    | 14973 [R <sub>int</sub> = 0.0711, R <sub>sigma</sub> = 0.0403]                                   | 21372 [R <sub>int</sub> = 0.0504, R <sub>sigma</sub> = 0.0379]                     |
| Data/restraints/parameters                                   | 10656/0/584                                                                       | 14973/0/584                                                                                      | 21372/210/1389                                                                     |
| Goodness-of-fit on <i>F</i> <sup>2</sup>                     | 1.038                                                                             | 1.111                                                                                            | 1.101                                                                              |
| Final <i>R</i> indexes [ <i>I</i> ≥ 2 $\sigma$ ( <i>I</i> )] | R <sub>1</sub> = 0.0348, wR <sub>2</sub> = 0.0964                                 | R <sub>1</sub> = 0.0558, wR <sub>2</sub> = 0.1750                                                | R <sub>1</sub> = 0.0428, wR <sub>2</sub> = 0.1128                                  |
| Final <i>R</i> indexes [all data]                            | R <sub>1</sub> = 0.0367, wR <sub>2</sub> = 0.0978                                 | R <sub>1</sub> = 0.0609, wR <sub>2</sub> = 0.1813                                                | R <sub>1</sub> = 0.0488, wR <sub>2</sub> = 0.1181                                  |
| Largest diff. peak/hole (e Å <sup>-3</sup> )                 | 0.29/-0.32                                                                        | 0.72/-0.73                                                                                       | 0.39/-0.41                                                                         |



**Table S2.** Crystallographic data and structure refinement parameters for compound 4·2*i*Pr<sub>2</sub>O at 100, 150, 200 and 250 K.

|                                                              | 4·2 <i>i</i> Pr <sub>2</sub> O (100 K)                                           | 4·2 <i>i</i> Pr <sub>2</sub> O (150 K)                                           | 4·2 <i>i</i> Pr <sub>2</sub> O (200 K)                                           | 4·2 <i>i</i> Pr <sub>2</sub> O (250 K)                                           |
|--------------------------------------------------------------|----------------------------------------------------------------------------------|----------------------------------------------------------------------------------|----------------------------------------------------------------------------------|----------------------------------------------------------------------------------|
| Empirical formula                                            | C <sub>132</sub> H <sub>116</sub> B <sub>2</sub> FeN <sub>6</sub> O <sub>2</sub> | C <sub>132</sub> H <sub>116</sub> B <sub>2</sub> FeN <sub>6</sub> O <sub>2</sub> | C <sub>132</sub> H <sub>116</sub> B <sub>2</sub> FeN <sub>6</sub> O <sub>2</sub> | C <sub>132</sub> H <sub>116</sub> B <sub>2</sub> FeN <sub>6</sub> O <sub>2</sub> |
| Formula weight                                               | 1895.77                                                                          | 1895.77                                                                          | 1895.77                                                                          | 1895.77                                                                          |
| Temperature (K)                                              | 100.0(2)                                                                         | 150.0(2)                                                                         | 200.0(2)                                                                         | 250.0(2)                                                                         |
| Crystal system                                               | monoclinic                                                                       | monoclinic                                                                       | monoclinic                                                                       | monoclinic                                                                       |
| Space group                                                  | C2/c                                                                             | C2/c                                                                             | C2/c                                                                             | C2/c                                                                             |
| <i>a</i> (Å)                                                 | 27.310(6)                                                                        | 27.350(6)                                                                        | 27.380(6)                                                                        | 27.440(6)                                                                        |
| <i>b</i> (Å)                                                 | 13.370(3)                                                                        | 13.400(3)                                                                        | 13.440(3)                                                                        | 13.470(3)                                                                        |
| <i>c</i> (Å)                                                 | 30.170(6)                                                                        | 30.240(6)                                                                        | 30.330(6)                                                                        | 30.390(6)                                                                        |
| $\alpha$ (°)                                                 | 90                                                                               | 90                                                                               | 90                                                                               | 90                                                                               |
| $\beta$ (°)                                                  | 114.31(3)                                                                        | 114.19(3)                                                                        | 113.99(3)                                                                        | 113.83(3)                                                                        |
| $\gamma$ (°)                                                 | 90                                                                               | 90                                                                               | 90                                                                               | 90                                                                               |
| Volume (Å <sup>3</sup> )                                     | 10039(4)                                                                         | 10109(4)                                                                         | 10197(4)                                                                         | 10275(4)                                                                         |
| <i>Z</i>                                                     | 4                                                                                | 4                                                                                | 4                                                                                | 4                                                                                |
| $\rho_{\text{calc}}$ (g/cm <sup>3</sup> )                    | 1.254                                                                            | 1.246                                                                            | 1.235                                                                            | 1.225                                                                            |
| $\mu$ (mm <sup>-1</sup> )                                    | 0.210                                                                            | 0.209                                                                            | 0.207                                                                            | 0.205                                                                            |
| <i>F</i> (000)                                               | 4008.0                                                                           | 4008.0                                                                           | 4008.0                                                                           | 4008.0                                                                           |
| Crystal size (mm <sup>3</sup> )                              | 0.417 × 0.144 × 0.088                                                            | 0.417 × 0.144 × 0.088                                                            | 0.417 × 0.144 × 0.088                                                            | 0.417 × 0.144 × 0.088                                                            |
| Radiation                                                    | Synchrotron ( $\lambda = 0.71075$ )                                              |
| 2 $\theta$ range for data collection (°)                     | 2.962 to 58.452                                                                  | 2.954 to 58.414                                                                  | 2.94 to 58.568                                                                   | 2.93 to 58.68                                                                    |
| Index ranges                                                 | -34 ≤ <i>h</i> ≤ 35, -17 ≤ <i>k</i> ≤ 18, -40 ≤ <i>l</i> ≤ 40                    | -34 ≤ <i>h</i> ≤ 35, -18 ≤ <i>k</i> ≤ 18, -40 ≤ <i>l</i> ≤ 40                    | -34 ≤ <i>h</i> ≤ 35, -18 ≤ <i>k</i> ≤ 18, -40 ≤ <i>l</i> ≤ 38                    | -34 ≤ <i>h</i> ≤ 35, -18 ≤ <i>k</i> ≤ 18, -41 ≤ <i>l</i> ≤ 38                    |
| Reflections collected                                        | 132131                                                                           | 131953                                                                           | 132654                                                                           | 134435                                                                           |
| Independent reflections                                      | 12209 [R <sub>int</sub> = 0.0377, R <sub>sigma</sub> = 0.0163]                   | 12229 [R <sub>int</sub> = 0.0365, R <sub>sigma</sub> = 0.0161]                   | 12486 [R <sub>int</sub> = 0.0339, R <sub>sigma</sub> = 0.0158]                   | 12544 [R <sub>int</sub> = 0.0300, R <sub>sigma</sub> = 0.0134]                   |
| Data/restraints/parameters                                   | 12209/0/584                                                                      | 12229/0/584                                                                      | 12486/0/584                                                                      | 12544/0/584                                                                      |
| Goodness-of-fit on <i>F</i> <sup>2</sup>                     | 1.061                                                                            | 1.061                                                                            | 1.107                                                                            | 1.077                                                                            |
| Final <i>R</i> indexes [ <i>I</i> ≥ 2 $\sigma$ ( <i>I</i> )] | R <sub>1</sub> = 0.0400, wR <sub>2</sub> = 0.1084                                | R <sub>1</sub> = 0.0398, wR <sub>2</sub> = 0.1090                                | R <sub>1</sub> = 0.0391, wR <sub>2</sub> = 0.1099                                | R <sub>1</sub> = 0.0405, wR <sub>2</sub> = 0.1163                                |
| Final <i>R</i> indexes [all data]                            | R <sub>1</sub> = 0.0437, wR <sub>2</sub> = 0.1122                                | R <sub>1</sub> = 0.0440, wR <sub>2</sub> = 0.1142                                | R <sub>1</sub> = 0.0471, wR <sub>2</sub> = 0.1202                                | R <sub>1</sub> = 0.0454, wR <sub>2</sub> = 0.1222                                |
| Largest diff. peak/hole (e Å <sup>-3</sup> )                 | 0.25/-0.41                                                                       | 0.28/-0.38                                                                       | 0.33/-0.35                                                                       | 0.30/-0.37                                                                       |

**Table S3.** Crystallographic data and structure refinement parameters for compound 4·2*i*Pr<sub>2</sub>O at 300, 350, 375 and 400 K.

|                                                     | 4·2 <i>i</i> Pr <sub>2</sub> O (300 K)                                           | 4·2 <i>i</i> Pr <sub>2</sub> O (350 K)                                           | 4·2 <i>i</i> Pr <sub>2</sub> O (375 K)                                           | 4·2 <i>i</i> Pr <sub>2</sub> O (400 K)                                           |
|-----------------------------------------------------|----------------------------------------------------------------------------------|----------------------------------------------------------------------------------|----------------------------------------------------------------------------------|----------------------------------------------------------------------------------|
| Empirical formula                                   | C <sub>132</sub> H <sub>116</sub> B <sub>2</sub> FeN <sub>6</sub> O <sub>2</sub> | C <sub>132</sub> H <sub>116</sub> B <sub>2</sub> FeN <sub>6</sub> O <sub>2</sub> | C <sub>132</sub> H <sub>116</sub> B <sub>2</sub> FeN <sub>6</sub> O <sub>2</sub> | C <sub>132</sub> H <sub>116</sub> B <sub>2</sub> FeN <sub>6</sub> O <sub>2</sub> |
| Formula weight                                      | 1895.77                                                                          | 1895.77                                                                          | 1895.77                                                                          | 1895.77                                                                          |
| Temperature (K)                                     | 300.0(2)                                                                         | 350.0(2)                                                                         | 375.0(2)                                                                         | 400.0(2)                                                                         |
| Crystal system                                      | monoclinic                                                                       | monoclinic                                                                       | monoclinic                                                                       | monoclinic                                                                       |
| Space group                                         | C2/c                                                                             | C2/c                                                                             | C2/c                                                                             | C2/c                                                                             |
| <i>a</i> (Å)                                        | 27.510(6)                                                                        | 27.640(6)                                                                        | 27.710(6)                                                                        | 27.790(6)                                                                        |
| <i>b</i> (Å)                                        | 13.520(3)                                                                        | 13.590(3)                                                                        | 13.640(3)                                                                        | 13.680(3)                                                                        |
| <i>c</i> (Å)                                        | 30.450(6)                                                                        | 30.520(6)                                                                        | 30.550(6)                                                                        | 30.560(6)                                                                        |
| <i>α</i> (°)                                        | 90                                                                               | 90                                                                               | 90                                                                               | 90                                                                               |
| <i>β</i> (°)                                        | 113.67(3)                                                                        | 113.51(3)                                                                        | 113.46(3)                                                                        | 113.40(3)                                                                        |
| <i>γ</i> (°)                                        | 90                                                                               | 90                                                                               | 90                                                                               | 90                                                                               |
| Volume (Å <sup>3</sup> )                            | 10373(4)                                                                         | 10512(4)                                                                         | 10592(4)                                                                         | 10662(4)                                                                         |
| <i>Z</i>                                            | 4                                                                                | 4                                                                                | 4                                                                                | 4                                                                                |
| $\rho_{\text{calc}}$ (g/cm <sup>3</sup> )           | 1.214                                                                            | 1.198                                                                            | 1.189                                                                            | 1.181                                                                            |
| $\mu$ (mm <sup>-1</sup> )                           | 0.203                                                                            | 0.201                                                                            | 0.199                                                                            | 0.198                                                                            |
| <i>F</i> (000)                                      | 4008.0                                                                           | 4008.0                                                                           | 4008.0                                                                           | 4008.0                                                                           |
| Crystal size (mm <sup>3</sup> )                     | 0.417 × 0.144 × 0.088                                                            | 0.417 × 0.144 × 0.088                                                            | 0.417 × 0.144 × 0.088                                                            | 0.417 × 0.144 × 0.088                                                            |
| Radiation                                           | Synchrotron ( $\lambda = 0.71075$ )                                              |
| 2 $\theta$ range for data collection (°)            | 2.92 to 58.588                                                                   | 2.91 to 58.69                                                                    | 2.906 to 58.654                                                                  | 2.904 to 58.692                                                                  |
| Index ranges                                        | -34 ≤ <i>h</i> ≤ 35, -18 ≤ <i>k</i> ≤ 18, -41 ≤ <i>l</i> ≤ 39                    | -34 ≤ <i>h</i> ≤ 36, -18 ≤ <i>k</i> ≤ 18, -41 ≤ <i>l</i> ≤ 39                    | -34 ≤ <i>h</i> ≤ 36, -18 ≤ <i>k</i> ≤ 18, -41 ≤ <i>l</i> ≤ 40                    | -33 ≤ <i>h</i> ≤ 36, -18 ≤ <i>k</i> ≤ 18, -41 ≤ <i>l</i> ≤ 39                    |
| Reflections collected                               | 136550                                                                           | 140022                                                                           | 141171                                                                           | 141625                                                                           |
| Independent reflections                             | 12698 [R <sub>int</sub> = 0.0301, R <sub>sigma</sub> = 0.0138]                   | 12871 [R <sub>int</sub> = 0.0330, R <sub>sigma</sub> = 0.0141]                   | 13005 [R <sub>int</sub> = 0.0294, R <sub>sigma</sub> = 0.0121]                   | 13115 [R <sub>int</sub> = 0.0297, R <sub>sigma</sub> = 0.0127]                   |
| Data/restraints/parameters                          | 12698/0/584                                                                      | 12871/0/584                                                                      | 13005/0/584                                                                      | 13115/0/584                                                                      |
| Goodness-of-fit on <i>F</i> <sup>2</sup>            | 1.074                                                                            | 1.073                                                                            | 1.085                                                                            | 1.042                                                                            |
| Final <i>R</i> indexes [ <i>I</i> ≥ 2σ( <i>I</i> )] | R <sub>1</sub> = 0.0378, wR <sub>2</sub> = 0.1153                                | R <sub>1</sub> = 0.0398, wR <sub>2</sub> = 0.1208                                | R <sub>1</sub> = 0.0427, wR <sub>2</sub> = 0.1301                                | R <sub>1</sub> = 0.0459, wR <sub>2</sub> = 0.1389                                |
| Final <i>R</i> indexes [all data]                   | R <sub>1</sub> = 0.0429, wR <sub>2</sub> = 0.1203                                | R <sub>1</sub> = 0.0470, wR <sub>2</sub> = 0.1276                                | R <sub>1</sub> = 0.0551, wR <sub>2</sub> = 0.1435                                | R <sub>1</sub> = 0.0603, wR <sub>2</sub> = 0.1556                                |
| Largest diff. peak/hole (e Å <sup>-3</sup> )        | 0.20/-0.30                                                                       | 0.20/-0.27                                                                       | 0.20/-0.27                                                                       | 0.21/-0.28                                                                       |

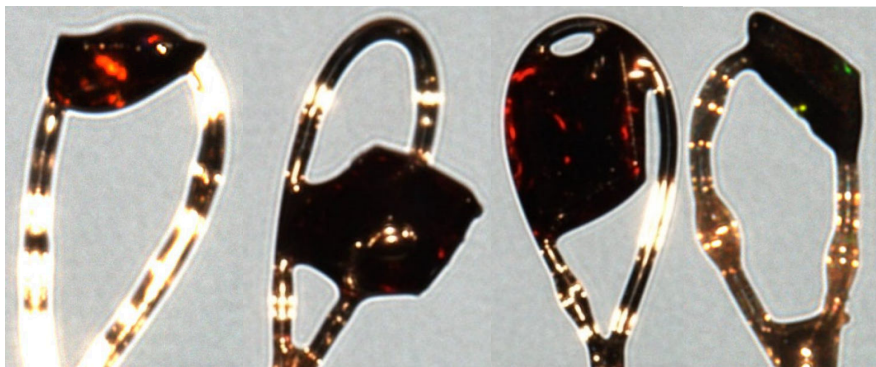

**Figure S3.** Crystal images of **1**, **2**, **3** and **4** at 100 K.

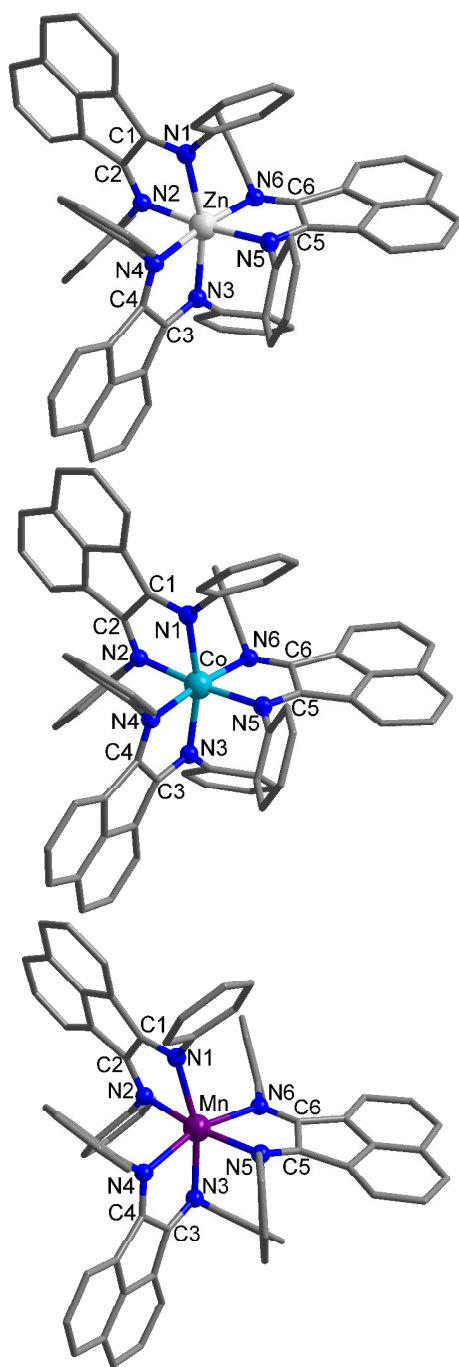

**Figure S4.** Cationic structure of **1**·3DCM (top), **2**·DCM·2*i*Pr<sub>2</sub>O (middle), and **3**·1.5*i*Pr<sub>2</sub>O (bottom) at 100 K with relevant atoms labelled. Hydrogen atoms, solvent molecules and BPh<sub>4</sub><sup>-</sup> anions have been omitted for clarity. Color code: C (dark grey), N (blue), Zn (light grey), Co (light blue), Mn (purple).

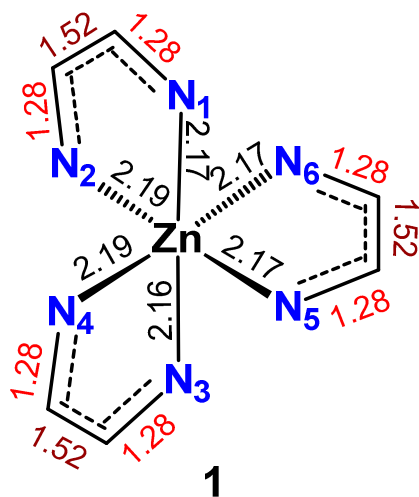

**1**

C-N<sub>av</sub>: 1.279 Å  
C-C<sub>av</sub>: 1.522 Å

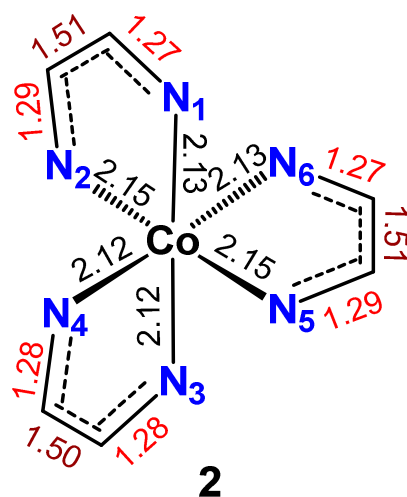

**2**

C-N<sub>av</sub>: 1.278 Å  
C-C<sub>av</sub>: 1.505 Å

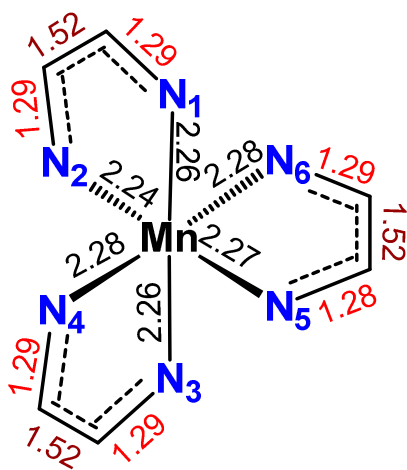

**3**

C-N<sub>av</sub>: 1.286 Å  
C-C<sub>av</sub>: 1.519 Å

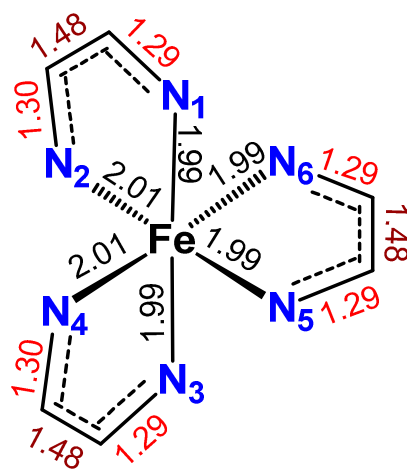

**4**

C-N<sub>av</sub>: 1.293 Å  
C-C<sub>av</sub>: 1.481 Å

**Figure S5.** Comparison of bond lengths in **1**·3DCM, **2**·DCM·2*i*Pr<sub>2</sub>O, **3**·1.5*i*Pr<sub>2</sub>O and **4**·2*i*Pr<sub>2</sub>O at 100 K.

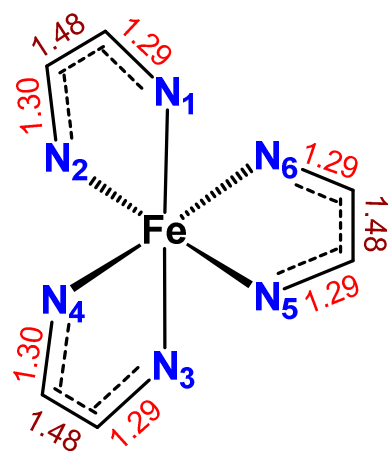

**4**

C-N<sub>av</sub>: 1.293 Å  
C-C<sub>av</sub>: 1.481 Å

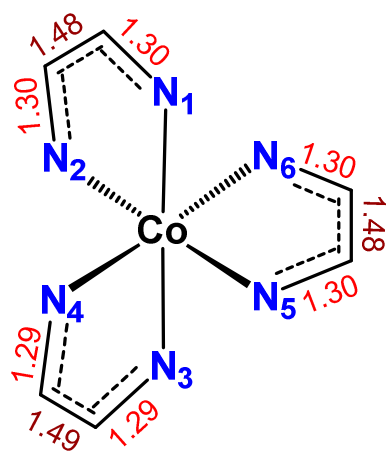

**[Co<sup>II</sup>(Ph-BIAN)<sub>3</sub>]<sup>+</sup>**

C-N<sub>av</sub>: 1.295 Å  
C-C<sub>av</sub>: 1.485 Å

**Figure S6.** Comparison of bond lengths in 4·2*i*Pr<sub>2</sub>O and [Co<sup>II</sup>(Ph-BIAN<sup>0</sup>)<sub>2</sub>(Ph-BIAN<sup>•-</sup>)]<sup>+</sup> at 100 K.<sup>10</sup>

**Table S4.** Selected Interatomic Distances (Å) and Distortion Parameters for 4·2*i*Pr<sub>2</sub>O.

| 4·2 <i>i</i> Pr <sub>2</sub> O       |          |          |          |          |          |          |          |          |
|--------------------------------------|----------|----------|----------|----------|----------|----------|----------|----------|
|                                      | 100 K    | 150 K    | 200 K    | 250 K    | 300 K    | 350 K    | 375 K    | 400 K    |
| Fe–N Interatomic Distances / Å       |          |          |          |          |          |          |          |          |
| Fe–N <sub>1</sub>                    | 1.991(2) | 1.994(2) | 1.995(1) | 1.999(1) | 2.000(1) | 2.019(1) | 2.039(1) | 2.065(1) |
| Fe–N <sub>2</sub>                    | 2.008(2) | 2.010(2) | 2.011(2) | 2.011(2) | 2.013(1) | 2.032(2) | 2.050(2) | 2.079(2) |
| Fe–N <sub>3</sub>                    | 1.991(2) | 1.994(2) | 1.995(1) | 1.999(1) | 2.000(1) | 2.019(1) | 2.039(1) | 2.065(1) |
| Fe–N <sub>4</sub>                    | 2.008(2) | 2.010(2) | 2.011(2) | 2.011(2) | 2.013(1) | 2.032(2) | 2.050(2) | 2.079(2) |
| Fe–N <sub>5</sub>                    | 1.991(2) | 1.993(2) | 1.994(1) | 1.998(1) | 2.000(1) | 2.012(1) | 2.034(1) | 2.063(1) |
| Fe–N <sub>6</sub>                    | 1.991(2) | 1.993(2) | 1.994(1) | 1.998(1) | 2.000(1) | 2.012(1) | 2.034(1) | 2.063(1) |
| Fe–N <sub>av</sub>                   | 1.997(5) | 1.999(5) | 2.000(3) | 2.003(3) | 2.004(2) | 2.021(3) | 2.041(3) | 2.070(3) |
| C–N/C–C Interatomic Distances / Å    |          |          |          |          |          |          |          |          |
| C <sub>1</sub> –N <sub>1</sub>       | 1.292(3) | 1.291(3) | 1.293(2) | 1.292(2) | 1.294(2) | 1.291(2) | 1.286(2) | 1.284(2) |
| C <sub>2</sub> –N <sub>2</sub>       | 1.295(3) | 1.292(3) | 1.298(2) | 1.296(2) | 1.294(2) | 1.289(2) | 1.295(2) | 1.289(2) |
| C <sub>3</sub> –N <sub>3</sub>       | 1.292(3) | 1.291(3) | 1.293(2) | 1.292(2) | 1.294(2) | 1.291(2) | 1.286(2) | 1.284(2) |
| C <sub>4</sub> –N <sub>4</sub>       | 1.295(3) | 1.292(3) | 1.298(2) | 1.296(2) | 1.294(2) | 1.289(2) | 1.295(2) | 1.289(2) |
| C <sub>5</sub> –N <sub>5</sub>       | 1.292(3) | 1.291(3) | 1.293(2) | 1.293(2) | 1.289(2) | 1.289(2) | 1.283(2) | 1.287(2) |
| C <sub>6</sub> –N <sub>6</sub>       | 1.292(3) | 1.291(3) | 1.293(2) | 1.293(2) | 1.289(2) | 1.289(2) | 1.283(2) | 1.287(2) |
| C–N <sub>av</sub>                    | 1.293(7) | 1.291(7) | 1.295(5) | 1.294(5) | 1.292(5) | 1.290(5) | 1.288(5) | 1.287(5) |
| C <sub>1</sub> –C <sub>2</sub>       | 1.482(3) | 1.485(3) | 1.482(3) | 1.482(2) | 1.483(2) | 1.487(2) | 1.488(2) | 1.494(2) |
| C <sub>3</sub> –C <sub>4</sub>       | 1.482(3) | 1.485(3) | 1.482(3) | 1.482(2) | 1.483(2) | 1.487(2) | 1.488(2) | 1.494(2) |
| C <sub>5</sub> –C <sub>6</sub>       | 1.480(4) | 1.479(4) | 1.477(3) | 1.478(3) | 1.477(2) | 1.479(3) | 1.484(3) | 1.486(3) |
| C–C <sub>av</sub>                    | 1.481(6) | 1.483(6) | 1.480(5) | 1.481(4) | 1.481(3) | 1.484(4) | 1.487(4) | 1.491(4) |
| <i>r</i> <sub>AB</sub> <sup>a</sup>  | 3.632(3) | 3.633(3) | 3.637(3) | 3.639(2) | 3.643(2) | 3.672(2) | 3.707(2) | 3.754(2) |
| Distortion Parameters                |          |          |          |          |          |          |          |          |
| SHAPE (O <sub>h</sub> ) <sup>a</sup> | 0.665    | 0.657    | 0.646    | 0.639    | 0.661    | 0.726    | 0.794    | 0.928    |
| Σ/ <sup>o</sup> b                    | 54.4     | 54.3     | 54.0     | 54.0     | 55.2     | 58.1     | 61.0     | 66.1     |
| Θ/ <sup>o</sup> b                    | 177.6    | 177.3    | 177.0    | 177.0    | 180.7    | 190.0    | 198.7    | 214.3    |
| BVS <sup>d</sup>                     | 3.67     | 3.65     | 3.64     | 3.61     | 3.60     | 3.44     | 3.26     | 3.02     |

<sup>a</sup> Average distance (Å) between the three N–C–C–N centroid.<sup>b</sup> *SHAPE* index for octahedral geometry in SHAPE 2.1.<sup>28,29</sup> A value of 0 represents a perfect octahedron.<sup>c</sup> Σ = sum of the deviation of the 12 N/O–Co–N/O angles from 90°. Θ = sum of the deviation of 24 unique torsional angles between the N/O atoms on opposite triangular faces of the octahedron from 60°, providing the degree of trigonal distortion from an octahedron to trigonal prism. These were calculated using OctaDist<sup>30</sup> - a program for determining the structural distortion of the octahedral complexes. For a perfect octahedron, Σ and Θ are zero.<sup>d</sup> Bond valence sum.<sup>31,32</sup>

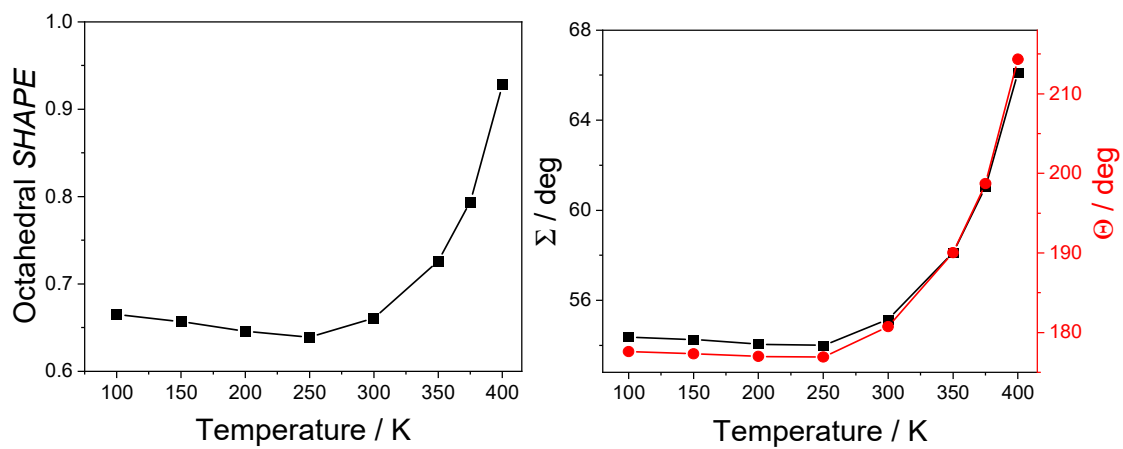

**Figure S7.** Temperature dependence of the octahedral SHAPE parameter,  $\Sigma$  and  $\Theta$  distortion parameters for  $4 \cdot 2iPr_2O$ .



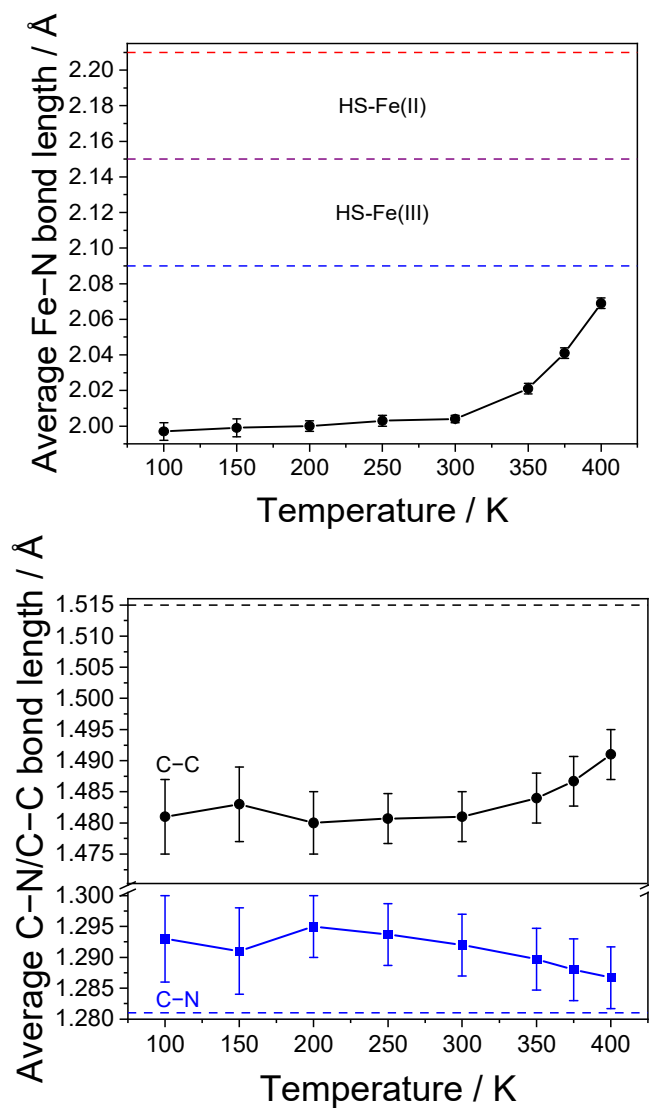

**Figure S8.** Temperature dependence of the average Fe-N for  $4 \cdot 2iPr_2O$  vs regions of bond lengths associated with HS-Fe(III) and HS-Fe(II) (dashed lines) (top) and the average C-C and C-N for  $4 \cdot 2iPr_2O$  vs the average C-C (black dashed line) and C-N (blue dotted line) of  $1 \cdot 3DCM$   $2 \cdot DCM \cdot 2iPr_2O$ , and  $3 \cdot 1.5iPr_2O$ .

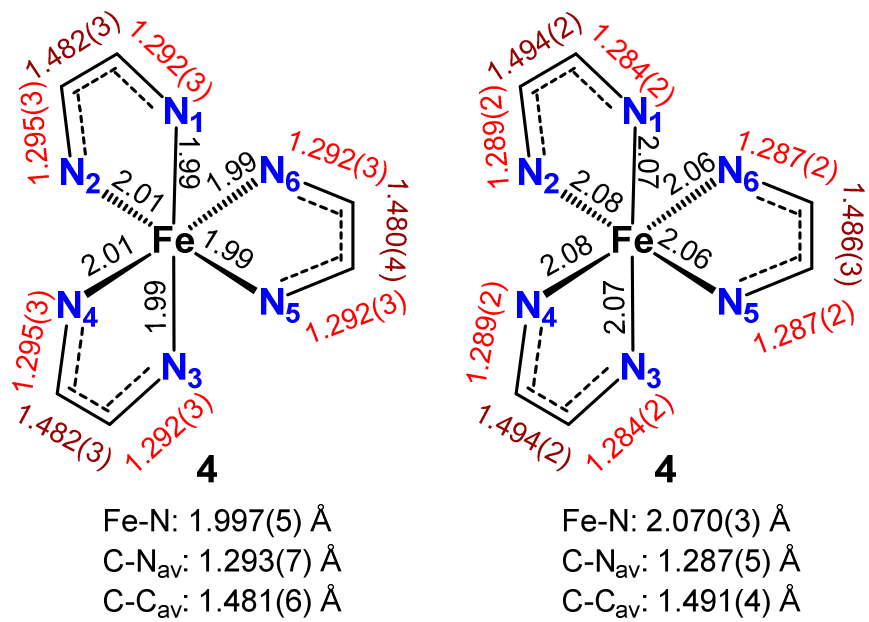

**Figure S9.** Comparison of bond lengths 4·2*i*Pr<sub>2</sub>O at 100 K (left) and 400 K (right).

## Infrared Spectroscopy

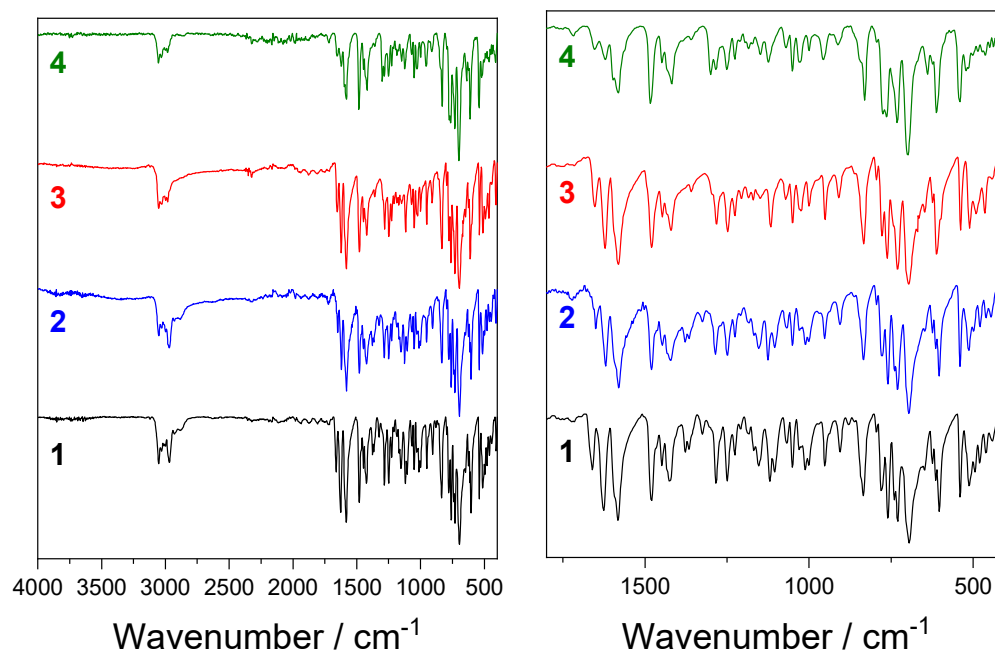

**Figure S10.** ATR-IR spectra of **1**·1.5DCE·1.5*i*Pr<sub>2</sub>O, **2**·DCE·1.6*i*Pr<sub>2</sub>O, **3**·0.4*i*Pr<sub>2</sub>O and **4**·1.7*i*Pr<sub>2</sub>O in the region 4000 –400 cm<sup>-1</sup> (left) and 1800 – 400 cm<sup>-1</sup> (right).

## Solid-State Magnetic Data

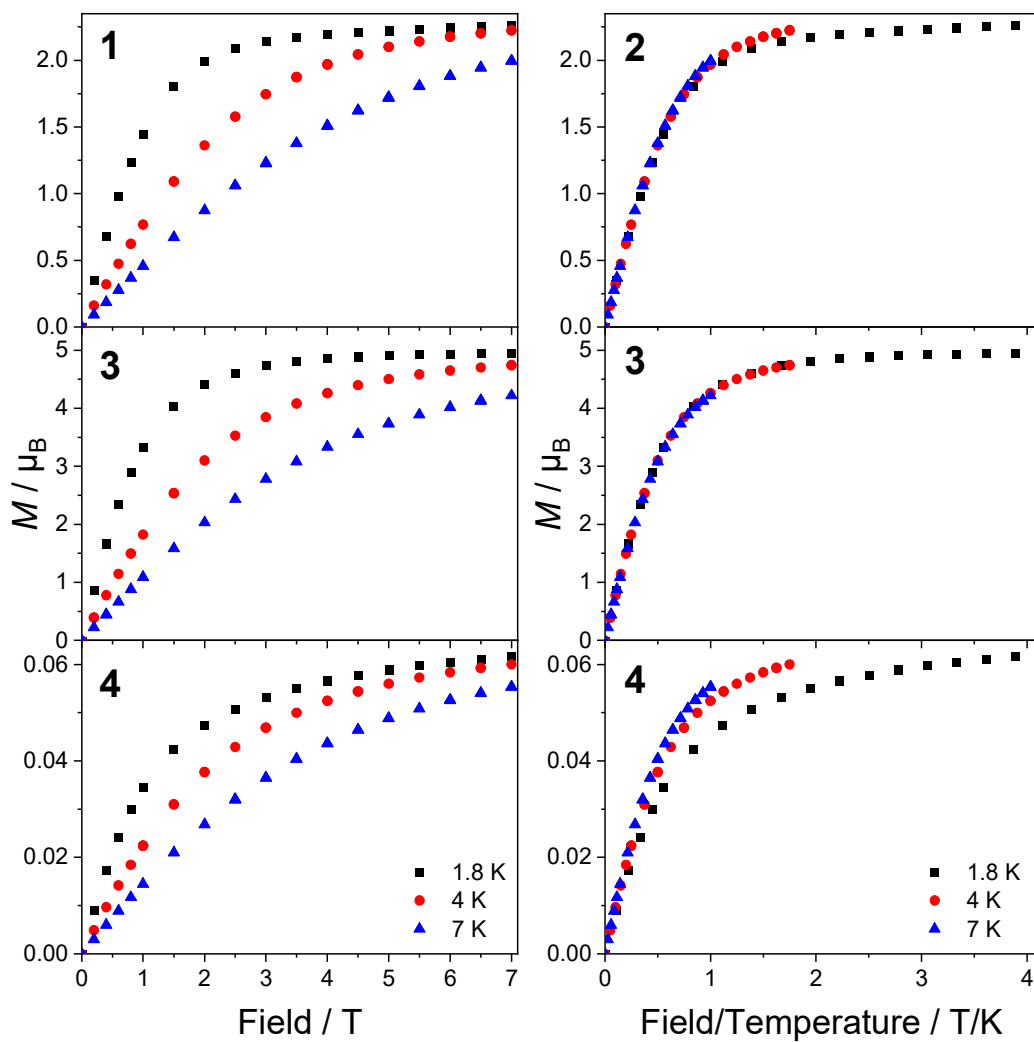

**Figure S11.** The field dependence of magnetization vs temperature (left) and the plot of magnetization vs field/temperature (right) for  $2 \cdot \text{DCE} \cdot 1.6i\text{Pr}_2\text{O}$ ,  $3 \cdot 0.4i\text{Pr}_2\text{O}$  and  $4 \cdot 1.7i\text{Pr}_2\text{O}$  at specified temperatures.

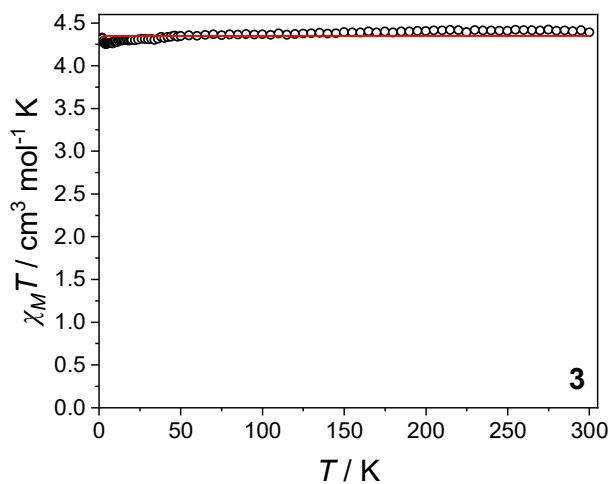

**Figure S12.** Plot of  $\chi_M T$  vs  $T$  for  $3 \cdot 0.3iPr_2O$  (open circles) fit with  $g = 1.994(1)$  (red line) using *PHI*.<sup>33</sup>

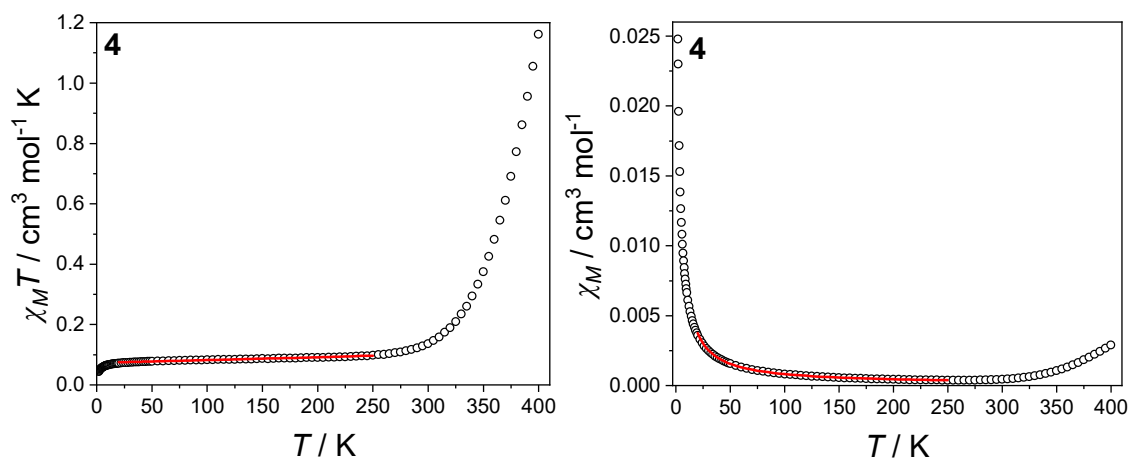

**Figure S13.** Plot of  $\chi_M T$  vs  $T$  (left) and  $\chi_M$  vs  $T$  (right) for  $4 \cdot 1.7iPr_2O$  (open circles) fit with  $J = -700(50) \text{ cm}^{-1}$ ,  $g = 2.00$ ,  $TIP = 9.4(2) \times 10^{-5} \text{ cm}^3 \text{ mol}^{-1}$ , 2.4(1)%  $S = 3/2$  HS-Fe(II) impurity (red lines) using *PHI*.<sup>33</sup>

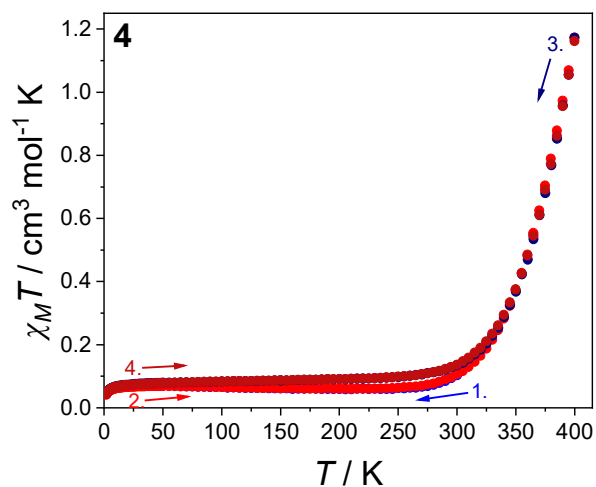

**Figure S14.** Plots of  $\chi_M T$  vs  $T$  for  $4 \cdot 1.7iPr_2O$  on first cooling (blue circles), first heating (red circles), second cooling (dark blue circles) and second heating (dark red circles). Arrows indicate direction and number indicates order of measurement.

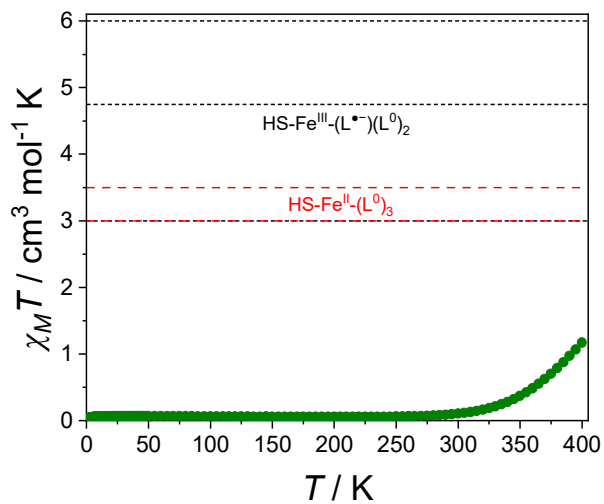

**Figure S15.** Plots of  $\chi_M T$  vs  $T$  for  $4 \cdot 1.7iPr_2O$  on first heating with the dashed red line representing theoretical region of  $HS-Fe^{II}-(L^0)_3$  ( $3.0 - 3.5 \text{ cm}^3 \text{ mol}^{-1}$ ) and dotted black line representing theoretical region of  $HS-Fe^{III}-(L^{\bullet-})(L^0)_2$  ( $4.75 - 6.0 \text{ cm}^3 \text{ mol}^{-1}$ ).

## Photomagnetic Data

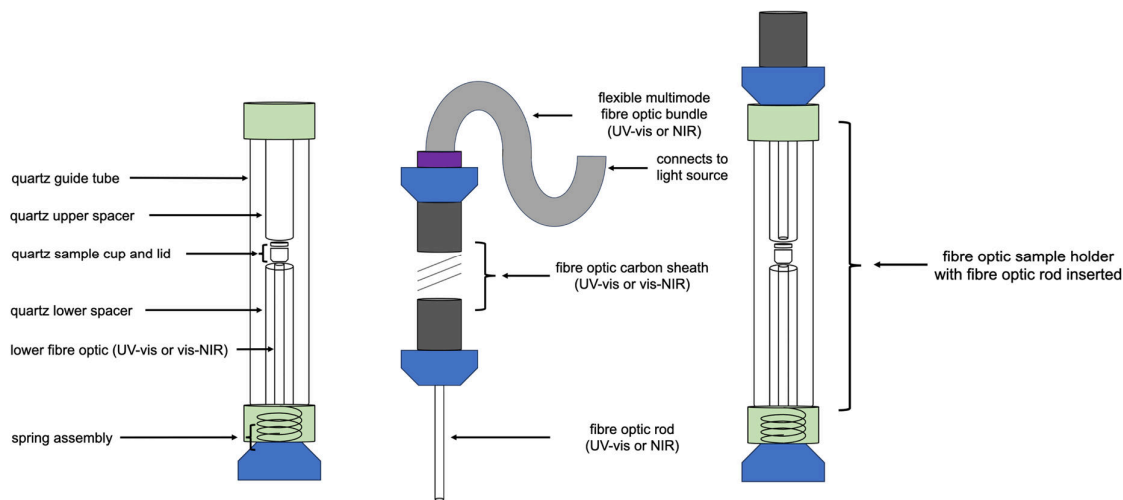

**Figure S16.** Photomagnetic sample holder schematic, with labelling of each component of the fibre optic sample holder (FOSH) setup.

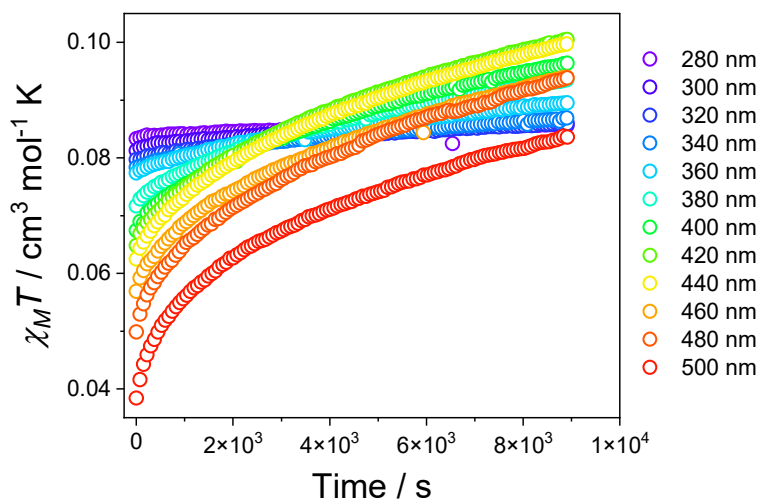

**Figure S17.** Photomagnetic response of  $4 \cdot 1.7i\text{Pr}_2\text{O}$  at different irradiation wavelengths at 10 K, plotted as  $\chi_M T$  vs Time.

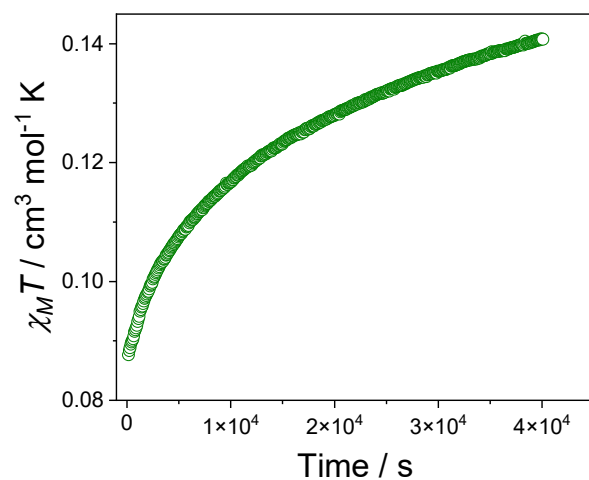

**Figure S18.**  $\chi_M T$  vs Time for  $4 \cdot 1.7i\text{Pr}_2\text{O}$  after irradiation at 420 nm at 10 K for 12 hours. Note, no photo-stationary point is reached even after 12 hours of continuous irradiation.

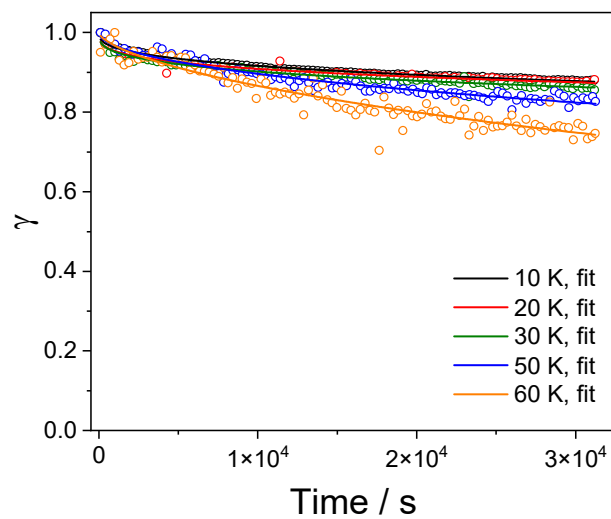

**Figure S19.** Isothermal relaxation curves of the photoinduced fraction for compound  $4 \cdot 1.7i\text{Pr}_2\text{O}$ , after 5 hours of 420 nm irradiation at 10 K. The raw data was reduced by averaging every four data points.



**Table S5.** Parameters obtained from the stretched exponential fits to the relaxation decay curves of compound **4·1.7iPr<sub>2</sub>O**.

| <i>T</i> / K | $\tau$ / s         | $\beta$ |
|--------------|--------------------|---------|
| 10           | $8.41 \times 10^6$ | 0.36    |
| 20           | $2.26 \times 10^7$ | 0.30    |
| 30           | $1.19 \times 10^7$ | 0.32    |
| 50           | $7.18 \times 10^5$ | 0.52    |
| 60           | $2.11 \times 10^5$ | 0.64    |

## Density Functional Theory

**Table S6.** Spin states ( $S$ ), total energies without ( $E$ ) and with ( $E^{ZPE}$ ) zero-point harmonic vibrations, relative energies ( $\Delta E$ ), spin density at the metal center ( $q_s^M$ ) and expectation values of the spin-squared operator ( $\hat{S}^2$ ) of the cationic complexes of **2**, **3** and **4** calculated by the DFT UTPSSh/UOPBE/6-311++G(d,p) method.

|                 | <b>Electromer</b>                                                         | <b><math>S</math></b> | <b><math>E</math> (a.u.)</b> | <b><math>E^{ZPE}</math> (a.u.)</b> | <b><math>\Delta E</math> (kcal mol<sup>-1</sup>)</b> | <b><math>q_s^M</math></b> | <b><math>\hat{S}^2</math></b> |
|-----------------|---------------------------------------------------------------------------|-----------------------|------------------------------|------------------------------------|------------------------------------------------------|---------------------------|-------------------------------|
| <b>2</b>        | LS-Co <sup>II</sup> -(L <sup>0</sup> ) <sub>3</sub>                       | 1/2                   | -4484.473190                 | -4483.478182                       | 3.8                                                  | 0.94                      | 0.772                         |
|                 | HS-Co <sup>II</sup> -(L <sup>0</sup> ) <sub>3</sub>                       | 3/2                   | -4484.479179                 | -4483.485667                       | 0.0                                                  | 2.40                      | 3.766                         |
| <b>3</b>        | HS-Mn <sup>II</sup> -(L <sup>0</sup> ) <sub>3</sub>                       | 5/2                   | -4252.747236                 | -4251.754994                       | 0.0                                                  | 4.61                      | 8.757                         |
|                 | LS-Mn <sup>II</sup> -(L <sup>0</sup> ) <sub>3</sub>                       | 1/2                   | -4252.738621                 | -4251.742329                       | 5.4                                                  | 1.56                      | 0.922                         |
|                 | HS-Mn <sup>III</sup> -(L <sup>•-</sup> )(L <sup>0</sup> ) <sub>2</sub> BS | 3/2                   | -4252.723245                 | –                                  | 15.1                                                 | 3.69                      | 4.269                         |
| <b>4 UTPSSh</b> | LS-Fe <sup>II</sup> -(L <sup>0</sup> ) <sub>3</sub>                       | 0                     | -4365.447998                 | -4364.450691                       | 0.0                                                  | 0.00                      | 0.000                         |
|                 | IS-Fe <sup>II</sup> -(L <sup>0</sup> ) <sub>3</sub>                       | 1                     | -4365.424756                 | -4364.430540                       | 14.6                                                 | 2.15                      | 2.092                         |
|                 | HS-Fe <sup>II</sup> -(L <sup>0</sup> ) <sub>3</sub>                       | 2                     | -4365.434053                 | -4364.441706                       | 8.8                                                  | 3.65                      | 6.067                         |
|                 | HS-Fe <sup>III</sup> -(L <sup>•-</sup> )(L <sup>0</sup> ) <sub>2</sub>    | 3                     | -4365.389070                 | -4364.397315                       | 37.0                                                 | 3.98                      | 12.026                        |
| <b>4 UOPBE</b>  | LS-Fe <sup>II</sup> -(L <sup>0</sup> ) <sub>3</sub>                       | 0                     | -4364.039577                 | -4363.053337                       | 2.0                                                  | 0.00                      | 0.000                         |
|                 | IS-Fe <sup>II</sup> -(L <sup>0</sup> ) <sub>3</sub>                       | 1                     | -4364.026721                 | -4363.043426                       | 10.1                                                 | 2.56                      | 2.352                         |
|                 | HS-Fe <sup>II</sup> -(L <sup>0</sup> ) <sub>3</sub>                       | 2                     | -4364.042826                 | -4363.060752                       | 0.0                                                  | 3.47                      | 6.174                         |
|                 | HS-Fe <sup>III</sup> -(L <sup>•-</sup> )(L <sup>0</sup> ) <sub>2</sub>    | 3                     | -4364.003410                 | -4363.024397                       | 24.7                                                 | 3.58                      | 12.015                        |

**Table S7.** Tabulated bond lengths of the geometry optimized electromers of the cationic units of **2** and **3** (UTPSSh/6-311++G(d,p)) with the experimentally determined values.

|                                | Compound 2                                          |                                                     |          | Compound 3                                          |                                                                          |                                                     |          |
|--------------------------------|-----------------------------------------------------|-----------------------------------------------------|----------|-----------------------------------------------------|--------------------------------------------------------------------------|-----------------------------------------------------|----------|
|                                | HS-Co <sup>II</sup> -(L <sup>0</sup> ) <sub>3</sub> | LS-Co <sup>II</sup> -(L <sup>0</sup> ) <sub>3</sub> | Exp      | HS-Mn <sup>II</sup> -(L <sup>0</sup> ) <sub>3</sub> | HS-Mn <sup>III</sup> -(L <sup>+</sup> )(L <sup>0</sup> ) <sub>2</sub> BS | LS-Mn <sup>II</sup> -(L <sup>0</sup> ) <sub>3</sub> | Exp      |
| M-N <sub>1</sub>               | 2.179                                               | 2.242                                               | 2.131(1) | 2.286                                               | 2.357                                                                    | 2.035                                               | 2.262(1) |
| M-N <sub>2</sub>               | 2.175                                               | 2.009                                               | 2.149(1) | 2.285                                               | 2.083                                                                    | 2.035                                               | 2.242(1) |
| M-N <sub>3</sub>               | 2.174                                               | 2.242                                               | 2.124(1) | 2.288                                               | 2.278                                                                    | 2.035                                               | 2.263(1) |
| M-N <sub>4</sub>               | 2.176                                               | 2.008                                               | 2.124(1) | 2.284                                               | 2.056                                                                    | 2.035                                               | 2.283(1) |
| M-N <sub>5</sub>               | 2.178                                               | 2.003                                               | 2.149(1) | 2.286                                               | 2.052                                                                    | 2.035                                               | 2.268(1) |
| M-N <sub>6</sub>               | 2.179                                               | 2.002                                               | 2.131(1) | 2.288                                               | 2.023                                                                    | 2.035                                               | 2.275(1) |
| M-N <sub>av</sub>              | 2.177                                               | 2.085                                               | 2.135(1) | 2.286                                               | 2.147                                                                    | 2.035                                               | 2.266(1) |
| C <sub>1</sub> -N <sub>1</sub> | 1.291                                               | 1.286                                               | 1.274(2) | 1.289                                               | 1.287                                                                    | 1.305                                               | 1.287(2) |
| C <sub>2</sub> -N <sub>2</sub> | 1.291                                               | 1.296                                               | 1.285(2) | 1.289                                               | 1.300                                                                    | 1.305                                               | 1.286(2) |
| C <sub>3</sub> -N <sub>3</sub> | 1.290                                               | 1.286                                               | 1.275(2) | 1.289                                               | 1.295                                                                    | 1.305                                               | 1.286(2) |
| C <sub>4</sub> -N <sub>4</sub> | 1.291                                               | 1.296                                               | 1.275(2) | 1.289                                               | 1.309                                                                    | 1.305                                               | 1.285(2) |
| C <sub>5</sub> -N <sub>5</sub> | 1.291                                               | 1.298                                               | 1.285(2) | 1.289                                               | 1.317                                                                    | 1.305                                               | 1.284(2) |
| C <sub>6</sub> -N <sub>6</sub> | 1.291                                               | 1.298                                               | 1.274(2) | 1.289                                               | 1.318                                                                    | 1.305                                               | 1.285(2) |
| C-N <sub>av</sub>              | 1.291                                               | 1.293                                               | 1.278(2) | 1.289                                               | 1.304                                                                    | 1.305                                               | 1.286(2) |
| C <sub>1</sub> -C <sub>2</sub> | 1.510                                               | 1.507                                               | 1.507(2) | 1.521                                               | 1.513                                                                    | 1.475                                               | 1.516(2) |
| C <sub>3</sub> -C <sub>4</sub> | 1.511                                               | 1.507                                               | 1.500(2) | 1.521                                               | 1.492                                                                    | 1.475                                               | 1.520(2) |
| C <sub>5</sub> -C <sub>6</sub> | 1.511                                               | 1.486                                               | 1.507(2) | 1.521                                               | 1.467                                                                    | 1.475                                               | 1.522(2) |
| C-C <sub>av</sub>              | 1.511                                               | 1.500                                               | 1.505(2) | 1.521                                               | 1.491                                                                    | 1.475                                               | 1.519(2) |

**Table S8.** Tabulated bond lengths of the geometry optimized electromers of the cationic units of **4** (UTPSSh/6-311++G(d,p), UOPBE/6-311++G(d,p)) with the experimentally determined values.

|                                | Compound 4 UOPBE                                        |                                                         |                                                                           |                                                         |          | Compound 4 UTPSSh                                       |                                                         |                                                                           |                                                         |          |
|--------------------------------|---------------------------------------------------------|---------------------------------------------------------|---------------------------------------------------------------------------|---------------------------------------------------------|----------|---------------------------------------------------------|---------------------------------------------------------|---------------------------------------------------------------------------|---------------------------------------------------------|----------|
|                                | HS-Fe <sup>II</sup> -<br>(L <sup>0</sup> ) <sub>3</sub> | LS-Fe <sup>II</sup> -<br>(L <sup>0</sup> ) <sub>3</sub> | HS-Fe <sup>III</sup> -<br>(L <sup>+</sup> )(L <sup>0</sup> ) <sub>2</sub> | IS-Fe <sup>II</sup> -<br>(L <sup>0</sup> ) <sub>3</sub> | Exp      | HS-Fe <sup>II</sup> -<br>(L <sup>0</sup> ) <sub>3</sub> | LS-Fe <sup>II</sup> -<br>(L <sup>0</sup> ) <sub>3</sub> | HS-Fe <sup>III</sup> -<br>(L <sup>+</sup> )(L <sup>0</sup> ) <sub>2</sub> | IS-Fe <sup>II</sup> -<br>(L <sup>0</sup> ) <sub>3</sub> | Exp      |
| Fe-N <sub>1</sub>              | 2.288                                                   | 2.011                                                   | 2.135                                                                     | 1.988                                                   | 1.991(2) | 2.192                                                   | 2.014                                                   | 2.197                                                                     | 1.991                                                   | 1.991(2) |
| Fe-N <sub>2</sub>              | 2.256                                                   | 2.012                                                   | 2.136                                                                     | 2.183                                                   | 2.008(2) | 2.197                                                   | 2.014                                                   | 2.247                                                                     | 2.155                                                   | 2.008(2) |
| Fe-N <sub>3</sub>              | 2.191                                                   | 2.012                                                   | 2.286                                                                     | 1.988                                                   | 1.991(2) | 2.192                                                   | 2.013                                                   | 2.194                                                                     | 2.158                                                   | 1.991(2) |
| Fe-N <sub>4</sub>              | 2.191                                                   | 2.012                                                   | 2.224                                                                     | 2.183                                                   | 2.008(2) | 2.197                                                   | 2.012                                                   | 2.242                                                                     | 1.991                                                   | 2.008(2) |
| Fe-N <sub>5</sub>              | 2.254                                                   | 2.012                                                   | 2.285                                                                     | 2.235                                                   | 1.991(2) | 2.226                                                   | 2.015                                                   | 2.055                                                                     | 2.187                                                   | 1.991(2) |
| Fe-N <sub>6</sub>              | 2.281                                                   | 2.012                                                   | 2.222                                                                     | 2.235                                                   | 1.991(2) | 2.226                                                   | 2.014                                                   | 2.055                                                                     | 2.191                                                   | 1.991(2) |
| Fe-N <sub>av</sub>             | 2.244                                                   | 2.012                                                   | 2.215                                                                     | 2.135                                                   | 1.997(2) | 2.205                                                   | 2.014                                                   | 2.165                                                                     | 2.112                                                   | 1.997(2) |
| C <sub>1</sub> -N <sub>1</sub> | 1.297                                                   | 1.308                                                   | 1.332                                                                     | 1.316                                                   | 1.292(3) | 1.294                                                   | 1.299                                                   | 1.291                                                                     | 1.303                                                   | 1.292(3) |
| C <sub>2</sub> -N <sub>2</sub> | 1.297                                                   | 1.308                                                   | 1.332                                                                     | 1.305                                                   | 1.295(3) | 1.293                                                   | 1.299                                                   | 1.291                                                                     | 1.296                                                   | 1.295(3) |
| C <sub>3</sub> -N <sub>3</sub> | 1.305                                                   | 1.309                                                   | 1.302                                                                     | 1.316                                                   | 1.292(3) | 1.294                                                   | 1.299                                                   | 1.291                                                                     | 1.296                                                   | 1.292(3) |
| C <sub>4</sub> -N <sub>4</sub> | 1.305                                                   | 1.308                                                   | 1.304                                                                     | 1.305                                                   | 1.295(3) | 1.293                                                   | 1.299                                                   | 1.291                                                                     | 1.303                                                   | 1.295(3) |
| C <sub>5</sub> -N <sub>5</sub> | 1.297                                                   | 1.309                                                   | 1.302                                                                     | 1.297                                                   | 1.292(3) | 1.289                                                   | 1.299                                                   | 1.353                                                                     | 1.290                                                   | 1.292(3) |
| C <sub>6</sub> -N <sub>6</sub> | 1.297                                                   | 1.308                                                   | 1.305                                                                     | 1.297                                                   | 1.292(3) | 1.289                                                   | 1.299                                                   | 1.353                                                                     | 1.290                                                   | 1.292(3) |
| C-N <sub>av</sub>              | 1.300                                                   | 1.308                                                   | 1.313                                                                     | 1.306                                                   | 1.293(3) | 1.292                                                   | 1.299                                                   | 1.312                                                                     | 1.296                                                   | 1.293(3) |
| C <sub>1</sub> -C <sub>2</sub> | 1.511                                                   | 1.473                                                   | 1.461                                                                     | 1.476                                                   | 1.482(3) | 1.507                                                   | 1.485                                                   | 1.513                                                                     | 1.489                                                   | 1.482(3) |
| C <sub>3</sub> -C <sub>4</sub> | 1.493                                                   | 1.473                                                   | 1.501                                                                     | 1.476                                                   | 1.482(3) | 1.507                                                   | 1.484                                                   | 1.514                                                                     | 1.489                                                   | 1.482(3) |
| C <sub>5</sub> -C <sub>6</sub> | 1.511                                                   | 1.473                                                   | 1.500                                                                     | 1.502                                                   | 1.480(4) | 1.519                                                   | 1.484                                                   | 1.440                                                                     | 1.508                                                   | 1.480(4) |
| C-C <sub>av</sub>              | 1.505                                                   | 1.473                                                   | 1.487                                                                     | 1.485                                                   | 1.481(3) | 1.511                                                   | 1.484                                                   | 1.489                                                                     | 1.495                                                   | 1.481(3) |

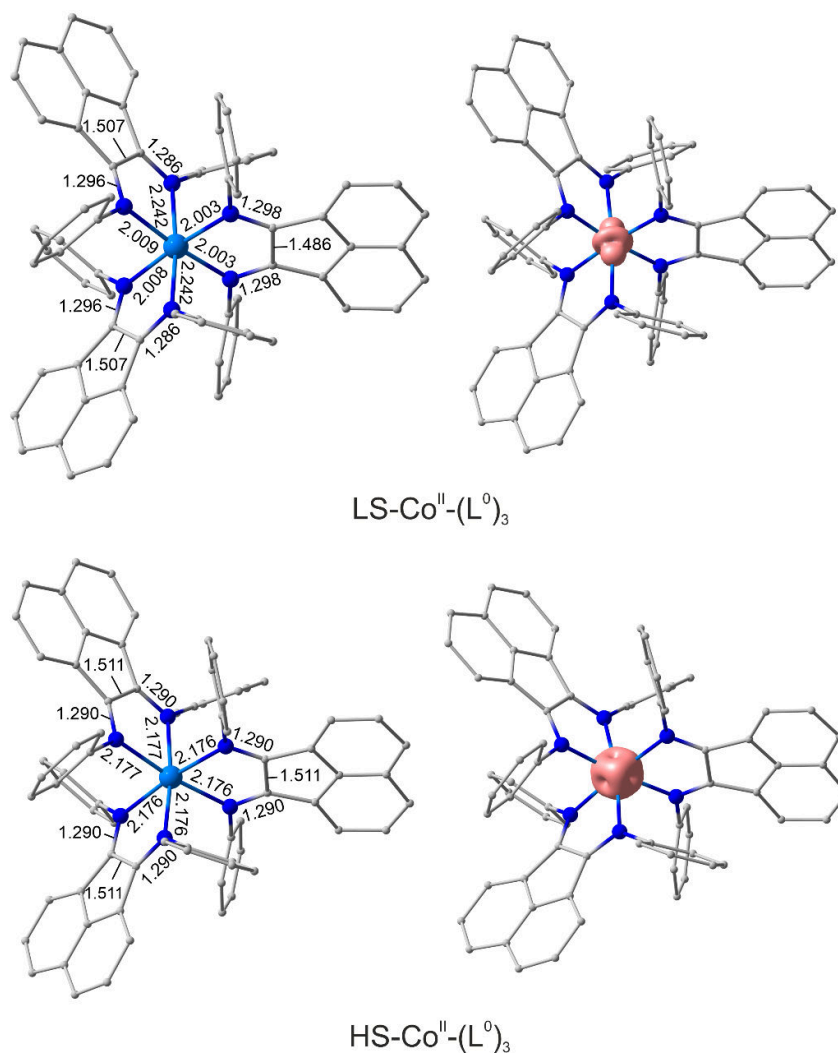

**Figure S20.** Optimized geometries (*left*) and spin density distributions (*right*) in the electromers of **2** calculated by the DFT UTPSSh/6-311++G(d,p) method. Hydrogen atoms are omitted for clarity, bond lengths are given in Å, contour value = 0.02 e Å<sup>-3</sup>.

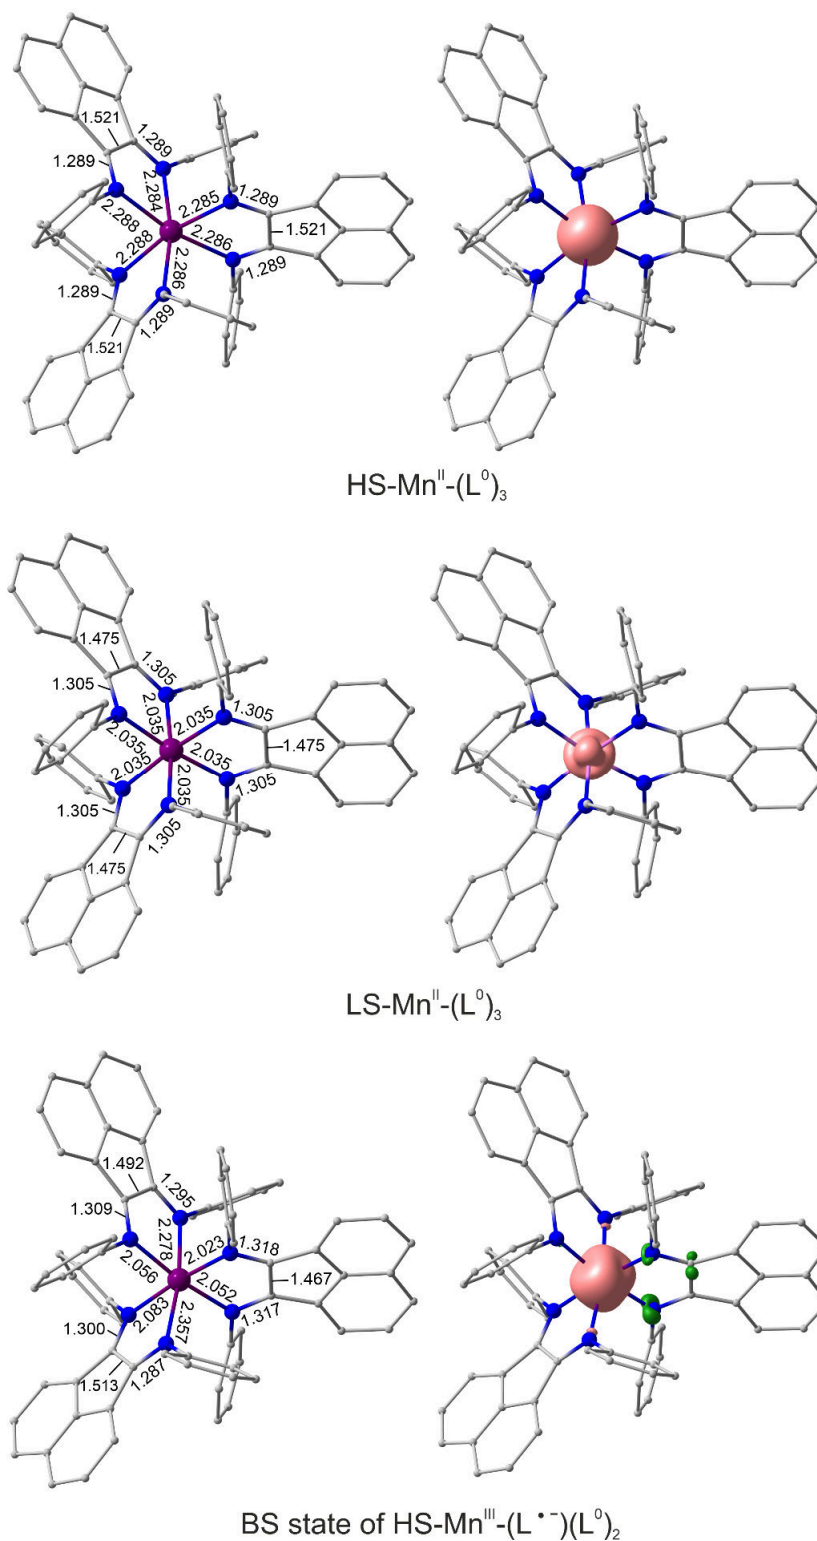

**Figure S21.** Optimized geometries (*left*) and spin density distributions (*right*) in the electromers of **3** calculated by the DFT UTPSSh/6-311++G(d,p) method. Hydrogen atoms are omitted for clarity, bond lengths are given in Å, contour value = 0.02 e Å<sup>-3</sup>.

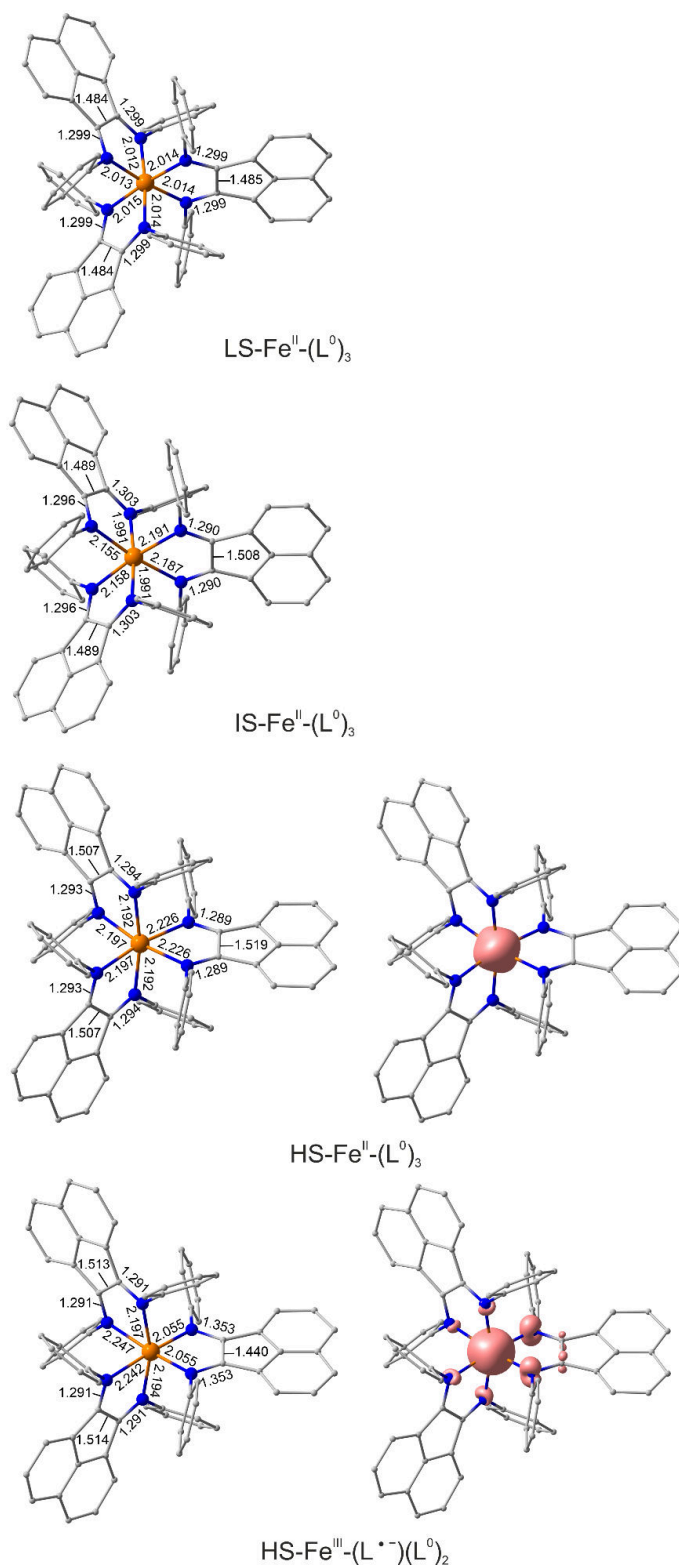

**Figure S22.** Optimized geometries (*left*) and spin density distributions (*right*) in the electromers of **4** calculated by the DFT UTPSSh/6-311++G(d,p) method. Hydrogen atoms are omitted for clarity, bond lengths are given in Å, contour value = 0.02 e Å<sup>-3</sup>.

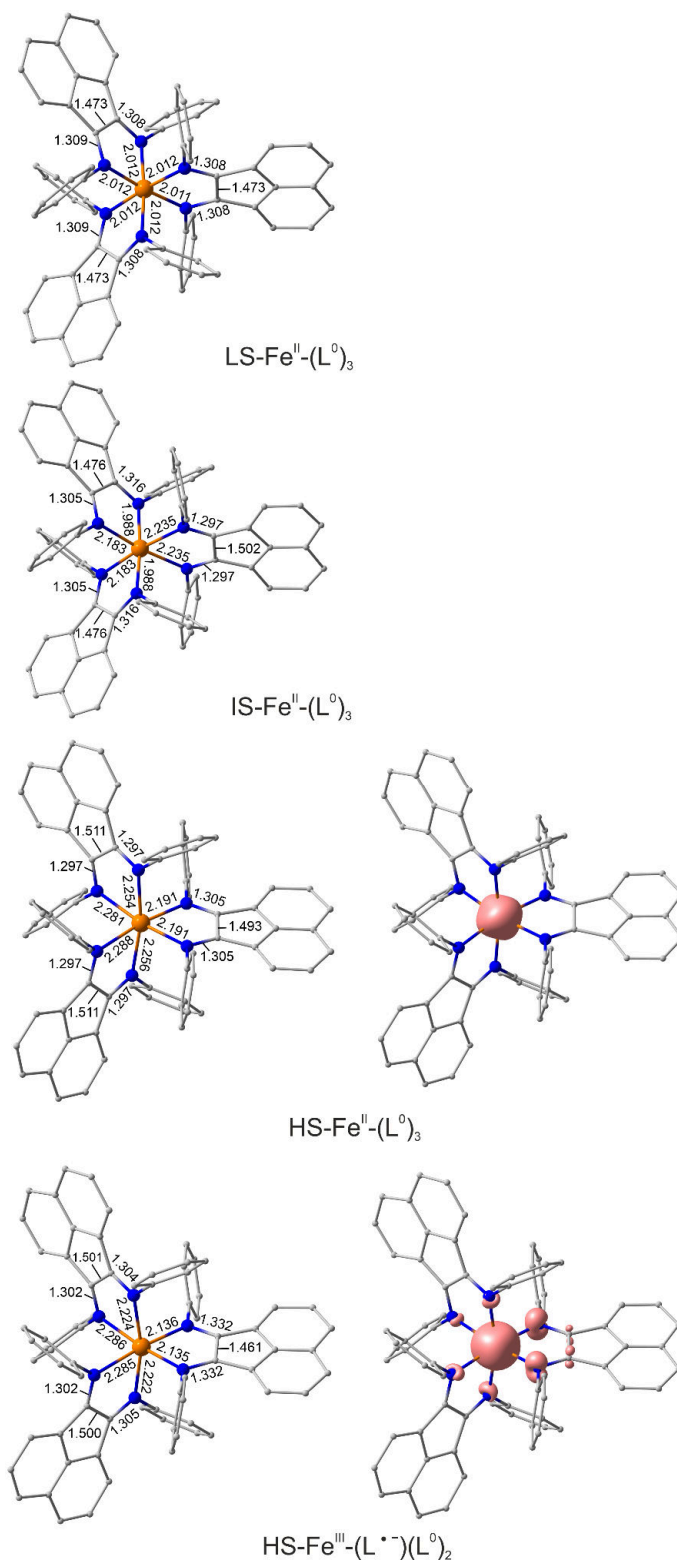

**Figure S23.** Optimized geometries (*left*) and spin density distributions (*right*) in the electromers of **4** calculated by the DFT UOPBE/6-311++G(d,p) method. Hydrogen atoms are omitted for clarity, bond lengths are given in Å, contour value = 0.02 e Å<sup>-3</sup>.



## UV-Vis-NIR Spectroscopy

**Table S9.** Electronic absorption bands for MeCN, DCE, THF and BuCN solutions and diffuse reflectance of compounds **1**, **2**, **3** and **4**.

| Assignment               | $\lambda / \text{nm}$<br>( $\epsilon / \text{mol L}^{-1} \text{cm}^{-1}$ ) | Assignment               | $\lambda / \text{nm}$<br>( $\epsilon / \text{mol L}^{-1} \text{cm}^{-1}$ ) | Assignment               | $\lambda / \text{nm}$<br>( $\epsilon / \text{mol L}^{-1} \text{cm}^{-1}$ ) | Assignment               | $\lambda / \text{nm}$<br>( $\epsilon / \text{mol L}^{-1} \text{cm}^{-1}$ ) | Assignment              | $\lambda / \text{nm}$<br>( $\epsilon / \text{mol L}^{-1} \text{cm}^{-1}$ ) | Ref   |
|--------------------------|----------------------------------------------------------------------------|--------------------------|----------------------------------------------------------------------------|--------------------------|----------------------------------------------------------------------------|--------------------------|----------------------------------------------------------------------------|-------------------------|----------------------------------------------------------------------------|-------|
| <b>1 (MeCN)</b>          |                                                                            | <b>1 (DCE)</b>           |                                                                            | <b>1 (THF)</b>           |                                                                            | <b>1 (BuCN)</b>          |                                                                            | <b>1 (solid state)</b>  |                                                                            |       |
| Ph-BIAN <sup>0</sup> IL  | 450 (2300), 424<br>(3800), 400<br>(4600), 381<br>(5100)                    | Ph-BIAN <sup>0</sup> IL  | 456 (2960), 428<br>(4770), 406<br>(5670), 384<br>(6500)                    | Ph-BIAN <sup>0</sup> IL  | 458 (2620), 425<br>(4600), 404<br>(5590), 384<br>(6340)                    | Ph-BIAN <sup>0</sup> IL  | 454 (3300), 424<br>(5810), 400<br>(7040), 382<br>(7670)                    | Ph-BIAN <sup>0</sup> IL | 414, 392                                                                   | 10,34 |
| Ph-BIAN <sup>0</sup> IL  | 324 (25,100)                                                               | Ph-BIAN <sup>0</sup> IL  | 326 (32,400)                                                               | Ph-BIAN <sup>0</sup> IL  | 325 (26,100)                                                               | Ph-BIAN <sup>0</sup> IL  | 325 (35,000)                                                               | Ph-BIAN <sup>0</sup> IL | 340                                                                        | 10,34 |
| <b>2 (MeCN)</b>          |                                                                            | <b>2 (DCE)</b>           |                                                                            | <b>2 (THF)</b>           |                                                                            | <b>2 (BuCN)</b>          |                                                                            | <b>2 (solid state)</b>  |                                                                            |       |
| Ph-BIAN <sup>0</sup> IL  | 398 (8700)                                                                 | Ph-BIAN <sup>0</sup> IL  | 412 (8680)                                                                 | Ph-BIAN <sup>0</sup> IL  | 408 (9060)                                                                 | Ph-BIAN <sup>0</sup> IL  | 403 (10,600)                                                               | Ph-BIAN <sup>0</sup> IL | 427                                                                        | 10,34 |
| Ph-BIAN <sup>0</sup> IL  | 326 (33,700)                                                               | Ph-BIAN <sup>0</sup> IL  | 328 (34,300)                                                               | Ph-BIAN <sup>0</sup> IL  | 328 (34,600)                                                               | Ph-BIAN <sup>0</sup> IL  | 326 (39,000)                                                               | Ph-BIAN <sup>0</sup> IL | 344                                                                        | 10,34 |
| <b>3 (MeCN)</b>          |                                                                            | <b>3 (DCE)</b>           |                                                                            | <b>3 (THF)</b>           |                                                                            | <b>3 (BuCN)</b>          |                                                                            | <b>3 (solid state)</b>  |                                                                            |       |
| Ph-BIAN <sup>0</sup> IL  | 396 (5800)                                                                 | Ph-BIAN <sup>0</sup> IL  | 407 (4100)                                                                 | Ph-BIAN <sup>0</sup> IL  | 392 (6000)                                                                 | Ph-BIAN <sup>0</sup> IL  | 398 (8000)                                                                 | Ph-BIAN <sup>0</sup> IL | 427                                                                        | 10,34 |
| Ph-BIAN <sup>0</sup> IL  | 320 (25,800)                                                               | Ph-BIAN <sup>0</sup> IL  | 326 (26,300)                                                               | Ph-BIAN <sup>0</sup> IL  | 304 (21,800)                                                               | Ph-BIAN <sup>0</sup> IL  | 319 (31,000)                                                               | Ph-BIAN <sup>0</sup> IL | 342                                                                        | 10,34 |
| <b>4 (MeCN)</b>          |                                                                            | <b>4 (DCE)</b>           |                                                                            | <b>4 (THF)</b>           |                                                                            | <b>4 (BuCN)</b>          |                                                                            | <b>4 (solid state)</b>  |                                                                            |       |
| IVCT                     | 1540 (410)                                                                 | IVCT                     | 1564 (130)                                                                 | IVCT                     | 1558 (2000)                                                                | IVCT                     | 1548 (150)                                                                 |                         |                                                                            | 10    |
| LMCT                     | 690 (12,000)                                                               | LMCT                     | 695 (17,000)                                                               | LMCT                     | 696 (12,100)                                                               | LMCT                     | 690 (10,900)                                                               | LMCT                    | 704                                                                        |       |
| Ph-BIAN <sup>•-</sup> IL | 444 (7290), 424<br>(8280)                                                  | Ph-BIAN <sup>•-</sup> IL | 448 (8440), 428<br>(8820)                                                  | Ph-BIAN <sup>•-</sup> IL | 448 (6700), 427<br>(7290)                                                  | Ph-BIAN <sup>•-</sup> IL | 444 (7000), 420<br>(7910)                                                  |                         |                                                                            | 35,36 |
| Ph-BIAN <sup>0</sup> IL  | 418 (8400)                                                                 | Ph-BIAN <sup>0</sup> IL  | 428 (8800)                                                                 | Ph-BIAN <sup>0</sup> IL  | 424 (7300)                                                                 | Ph-BIAN <sup>0</sup> IL  | 420 (7900)                                                                 | Ph-BIAN <sup>0</sup> IL | 430                                                                        | 10,34 |
| Ph-BIAN <sup>0</sup> IL  | 318 (36,300)                                                               | Ph-BIAN <sup>0</sup> IL  | 321 (35,400)                                                               | Ph-BIAN <sup>0</sup> IL  | 320 (31,900)                                                               | Ph-BIAN <sup>0</sup> IL  | 320 (34,100)                                                               | Ph-BIAN <sup>0</sup> IL | 339                                                                        | 10,34 |

Abbreviations: IL = intraligand, LMCT = ligand-to-metal charge transfer, IVCT = intervalence charge transfer

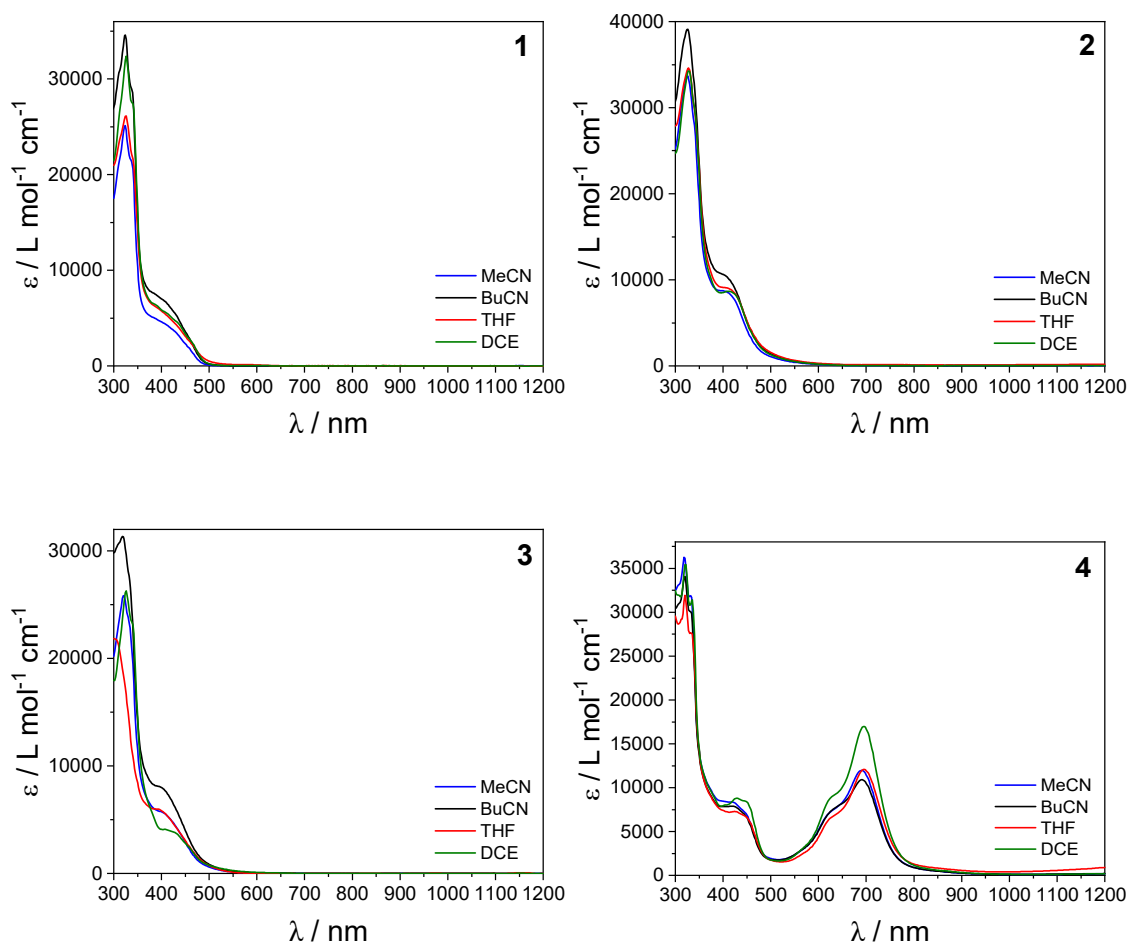

**Figure S24.** UV-Vis absorption spectra for MeCN, BuCN, THF and DCE solutions of **1**, **2**, **3** and **4** at 298 K.

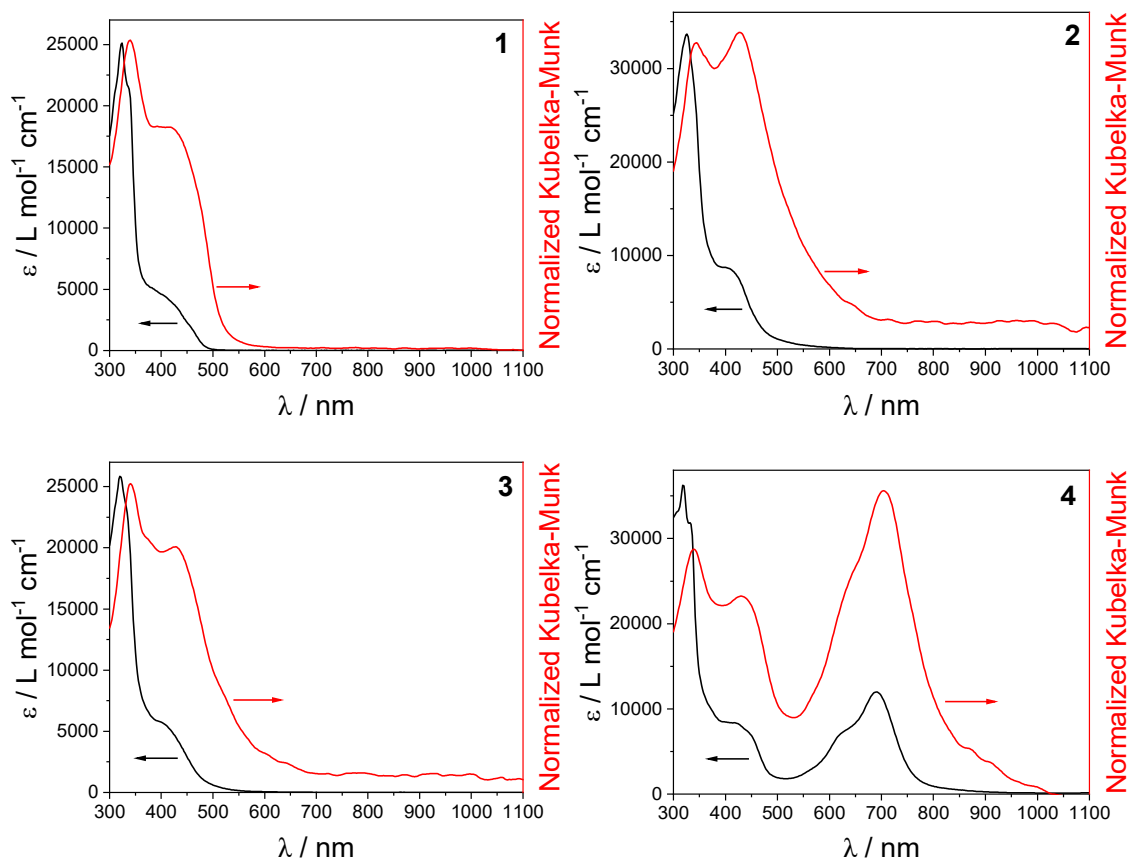

**Figure S25.** UV-Vis absorption spectra of **1**, **2**, **3** and **4** at room temperature as MeCN solutions (black line) and as diffuse reflectance (diluted ~5% in KBr).

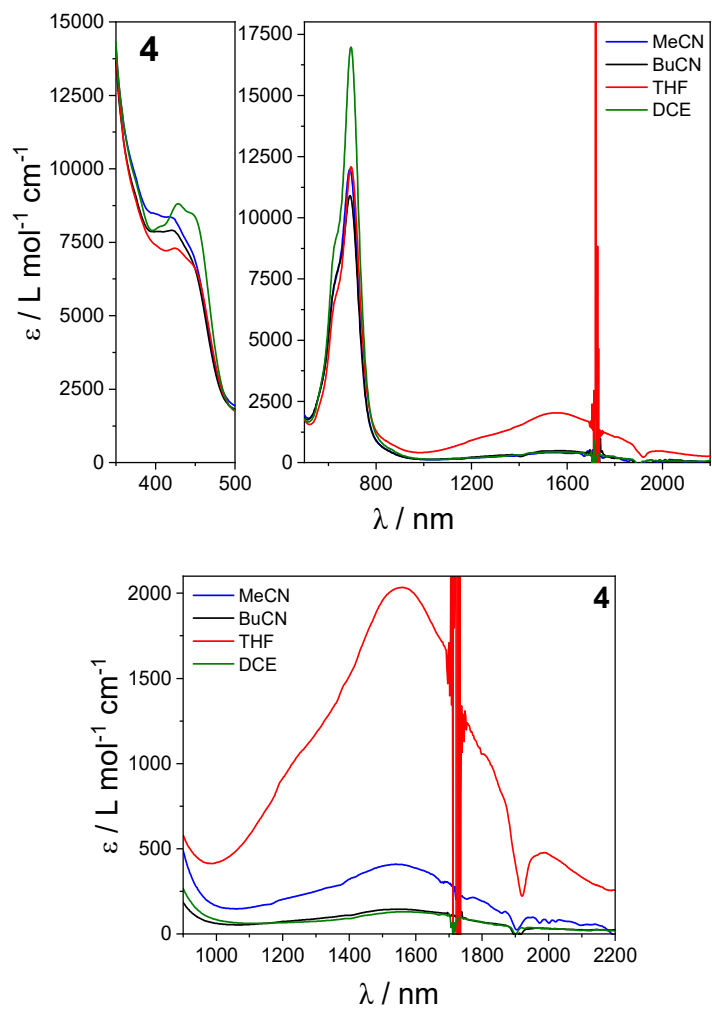

**Figure S26.** UV-Vis-NIR absorption spectra for MeCN, BuCN, THF and DCE solutions of **4** at 298 K.

## Robin-Day Mixed-Valence Classification Analysis

The degree of electronic communication between the Ar-BIAN ligands can be measured by the Robin and Day mixed-valence (MV) class of ligands.<sup>37</sup> Robin-Day Class I mixed-valence systems have a fully localized electronic structure and therefore have no interactions and electron transfer between the centers, with  $H_{AB} = 0 \text{ cm}^{-1}$ . Class II corresponds to a localized electronic structure and solvent environment, and as such intervalence charge transfer is intimately linked to the reorganization energy,  $\lambda$  (corrected for the emerging charge delocalization), and which in turn is linked to the energy of the optical charge transfer band ( $h\nu_{\text{max}} = \lambda$ ); for Class II systems  $H_{AB} \leq \lambda/2$ . There is a non-zero  $H_{AB}$  and a IVCT band with energy  $h\nu_{\text{max}}$  and full width at half maximum,  $\Delta\nu_{1/2}$ . The IVCT band for class II are typically solvent-dependent ( $\Delta\nu_{\text{max}} > 200 \text{ cm}^{-1}$  for a range of dielectric constant of 30), weak in intensity ( $\epsilon_{\text{max}} < 5000 \text{ L mol}^{-1} \text{ cm}^{-1}$ ), broad ( $\Delta\nu_{1/2} > 2000 \text{ cm}^{-1}$ ),  $H_{AB} < 800 \text{ cm}^{-1}$ , and  $2H_{AB}/\nu_{\text{max}} \ll 1$ .<sup>38-</sup>

<sup>41</sup> As the electronic coupling term increases, the thermal barrier to charge transfer in the ground state decreases, and the system becomes increasingly delocalized. In the limit where there is no ground state barrier to charge transfer, the system moves to Class III, and the coupling term can be simply related to the (solvent independent) IVCT band energy as  $2H_{AB} = h\nu_{\text{max}}$ , with the IVCT band displaying a pronounced asymmetric shape with a cut-off on the low-energy side. Meyer and colleagues have identified an intermediate case (Class II-III), distinct from the Class II/Class III boundary, in which the redox sites are localized (valence trapped) but electron transfer is faster than the rate of solvent reorganization.<sup>42</sup> This leads to a curious scenario in which the IVCT band offers the symmetric shape associated with Class II, but is not solvatochromic. Class II-III correspond to localized electronic structure and averaged solvent interactions, with  $0.7 < 2H_{AB}/\nu_{\text{max}} < 1$ , and class III represent electronic and solvent delocalization with  $2H_{AB}/\nu_{\text{max}} \gg 1$ . Both MV class II-III and III contain IVCT that are solvent

independent  $\nu_{\max} < 200 \text{ cm}^{-1}$  for a range of dielectric constant of 30), narrow ( $\Delta\nu_{1/2} < 2000 \text{ cm}^{-1}$ ), and intense ( $\epsilon_{\max} > 5000 \text{ L mol}^{-1} \text{ cm}^{-1}$ ).<sup>39</sup>

Class II species obey:<sup>42</sup>

$$(\Delta\nu_{1/2}^\circ)^2 = 16k_B T \nu_{\max} \ln 2 \quad (\text{eq. S4})$$

where  $\Delta\nu_{1/2}^\circ$  is the theoretical bandwidth at half maximum (in  $\text{cm}^{-1}$ ),  $k_B$  is the Boltzmann constant and  $T$  is the temperature in K. For a spectrum measured at 298 K, this gives:

$$\Delta\nu_{1/2}^\circ = 47.93 \sqrt{\nu_{\max}} \quad (\text{eq. S5})$$

The MV class can be determined by parameter  $\Gamma$ , given by:

$$\Gamma = 1 - (\Delta\nu_{1/2}) / (\Delta\nu_{1/2}^\circ) \quad (\text{eq. S6})$$

where  $\Gamma < 0.5$  indicate class II,  $\Gamma \approx 0.5$  indicate class II-III and  $\Gamma > 0.5$  indicate class III.

According to the Hush model,<sup>37,43</sup>  $H_{AB}$  can be calculated using:

$$H_{AB} = \frac{2.06 \times 10^{-2} (\nu_{\max} \epsilon_{\max} \Delta\nu_{1/2})^{1/2}}{r_{ab}} \quad (\text{eq. S7})$$

Where  $\epsilon_{\max}$  ( $\text{L mol}^{-1} \text{ cm}^{-1}$ ) is the molar absorptivity at  $\nu_{\max}$  and  $r_{AB}$  is the distance ( $\text{\AA}$ ) between the two centers, approximated for **4** as the average distance between the centroids of the three N-C-C-N ( $r_{AB} = 3.632 \text{ \AA}$ ).<sup>19,41</sup>

Values above the upper limit of  $H_{AB}$  correspond to MV class III complexes.

$$H_{ABupper} = \frac{\nu_{\max}}{2} \quad (\text{eq. S8})$$

The upper limit of **4** for peak 1 is 3199 (MeCN), 3160 (BuCN), 3170 (DCE) and 3150 (THF)  $\text{cm}^{-1}$ , and for peak 2 is 3860 (MeCN), 3850 (BuCN), 3950 (DCE) and 3800 (THF)  $\text{cm}^{-1}$ .

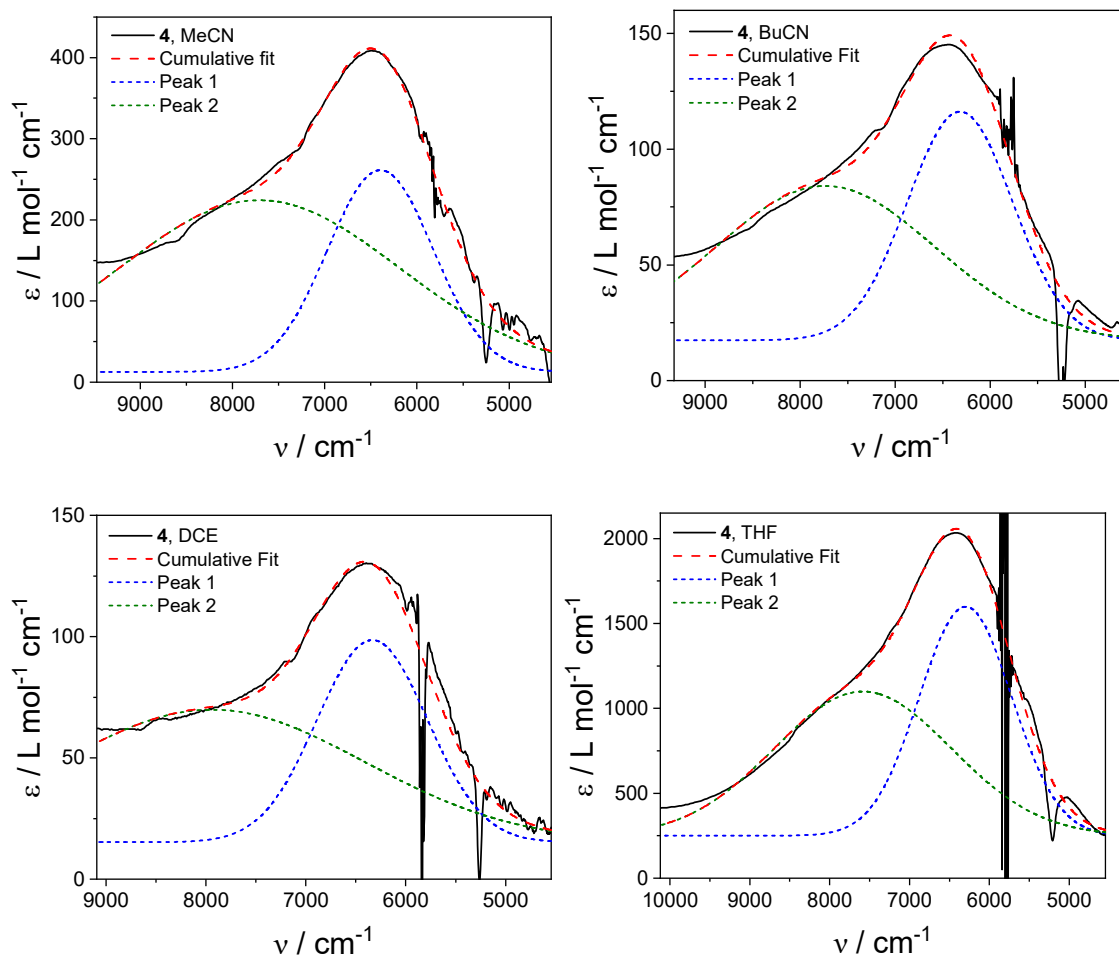

**Figure S27.** NIR spectrum of **4** in MeCN (top left), BuCN (top right), DCE (bottom left) and THF (bottom right) with a two peak Gaussian fit (MeCN:  $R^2 = 0.98$ ; BuCN:  $R^2 = 0.96$ ; DCE:  $R^2 = 0.91$ ; THF:  $R^2 = 0.99$ ).

**Table S10.** Mixed-valence and IVCT parameters for **4** in MeCN, BuCN, DCE and THF at 298

K.

|        | $\nu_{\max} / \text{cm}^{-1}$ | $\Delta\nu_{1/2} / \text{cm}^{-1}$ | $\epsilon_{\max} / \text{L mol}^{-1} \text{cm}^{-1}$ | $\Delta\nu_{1/2}^{\circ} / \text{cm}^{-1}$ <sup>a</sup> | $\Gamma$ <sup>b</sup> | $H_{ab} / \text{cm}^{-1}$ <sup>c</sup> | $2H_{AB}/\nu_{\max}$ |
|--------|-------------------------------|------------------------------------|------------------------------------------------------|---------------------------------------------------------|-----------------------|----------------------------------------|----------------------|
| MeCN   |                               |                                    |                                                      |                                                         |                       |                                        |                      |
| Peak 1 | 6397(8)                       | 1350(40)                           | 260                                                  | 3830                                                    | 0.65                  | 270                                    | 0.08                 |
| Peak 2 | 7710(80)                      | 3600(300)                          | 225                                                  | 4210                                                    | 0.14                  | 440                                    | 0.11                 |
| BuCN   |                               |                                    |                                                      |                                                         |                       |                                        |                      |
| Peak 1 | 6320(10)                      | 1300(70)                           | 115                                                  | 3810                                                    | 0.66                  | 180                                    | 0.06                 |
| Peak 2 | 7700(200)                     | 2700(400)                          | 85                                                   | 4200                                                    | 0.36                  | 230                                    | 0.06                 |
| DCE    |                               |                                    |                                                      |                                                         |                       |                                        |                      |
| Peak 1 | 6340(10)                      | 1300(90)                           | 100                                                  | 3820                                                    | 0.66                  | 160                                    | 0.05                 |
| Peak 2 | 7900(200)                     | 4000(1000)                         | 70                                                   | 4300                                                    | 0.06                  | 260                                    | 0.07                 |
| THF    |                               |                                    |                                                      |                                                         |                       |                                        |                      |
| Peak 1 | 6299(9)                       | 1370(50)                           | 1600                                                 | 3800                                                    | 0.64                  | 670                                    | 0.21                 |
| Peak 2 | 7600(200)                     | 2600(300)                          | 1100                                                 | 4180                                                    | 0.38                  | 820                                    | 0.22                 |

<sup>a</sup> Theoretical bandwidth at half maximum, calculated using equation S4 and S5. <sup>b</sup> Calculated using equation S6. <sup>c</sup> Calculated using equation S7.



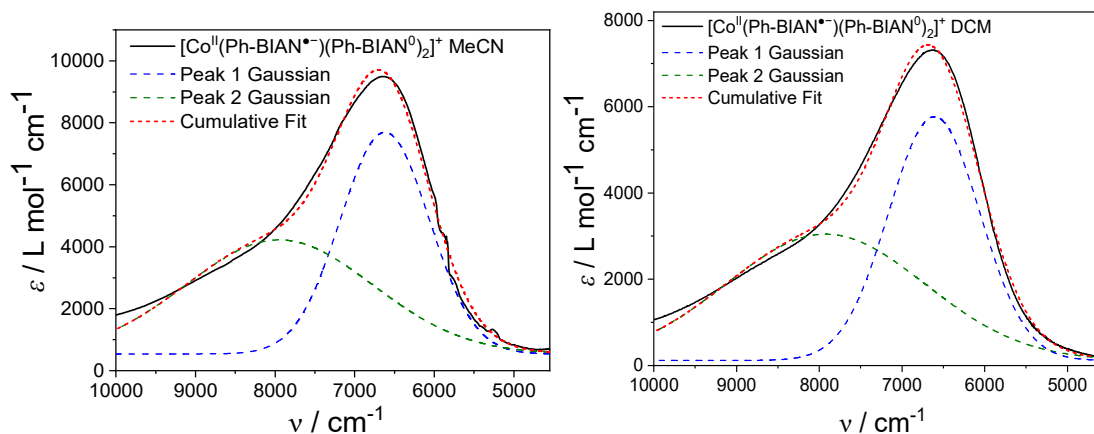

**Figure S28.** NIR spectrum of  $[\text{Co}^{\text{II}}(\text{Ph-BIAN}^{\bullet-})(\text{Ph-BIAN}^0)_2]^+$  in MeCN (left) and DCM (right) with a two peak Gaussian fit (MeCN:  $R^2 = 0.99$ ; DCM:  $R^2 = 0.99$ ).<sup>10</sup>

**Table S11.** IVCT and mixed-valence parameters for complex  $[\text{Co}^{\text{II}}(\text{Ph-BIAN}^{\bullet-})(\text{Ph-BIAN}^0)_2]^+$

| MeCN   |                                     |                                    |                                                            |                                                         |                       |                                        |                            |
|--------|-------------------------------------|------------------------------------|------------------------------------------------------------|---------------------------------------------------------|-----------------------|----------------------------------------|----------------------------|
|        | $\nu_{\text{max}} / \text{cm}^{-1}$ | $\Delta\nu_{1/2} / \text{cm}^{-1}$ | $\epsilon_{\text{max}} / \text{L mol}^{-1} \text{cm}^{-1}$ | $\Delta\nu_{1/2}^{\circ} / \text{cm}^{-1}$ <sup>a</sup> | $\Gamma$ <sup>b</sup> | $H_{ab} / \text{cm}^{-1}$ <sup>c</sup> | $2H_{AB}/\nu_{\text{max}}$ |
| Peak 1 | 6622(3)                             | 1320(20)                           | 7700                                                       | 3900                                                    | 0.66                  | 1380                                   | 0.42                       |
| Peak 2 | 7950(70)                            | 2800(100)                          | 4200                                                       | 4270                                                    | 0.34                  | 1630                                   | 0.41                       |
| DCM    |                                     |                                    |                                                            |                                                         |                       |                                        |                            |
| Peak 1 | 6610(2)                             | 1310(10)                           | 5700                                                       | 3900                                                    | 0.66                  | 1190                                   | 0.36                       |
| Peak 2 | 7930(30)                            | 2830(30)                           | 2200                                                       | 4270                                                    | 0.34                  | 1190                                   | 0.30                       |

<sup>a</sup> Theoretical bandwidth at half maximum, calculated using equation S4 and S5. <sup>b</sup> Calculated using equation S6. <sup>c</sup> Calculated using equation S7.

## Variable Temperature UV-Vis Spectroscopy

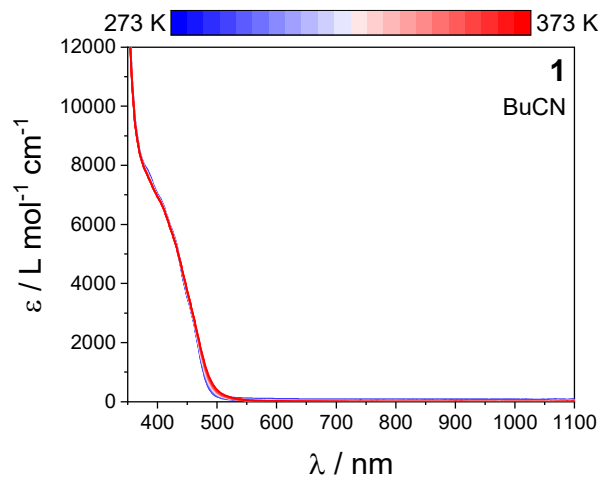

**Figure S29.** Variable temperature absorption spectra of **1** in BuCN between 273 and 373 K, in 5 K increments.

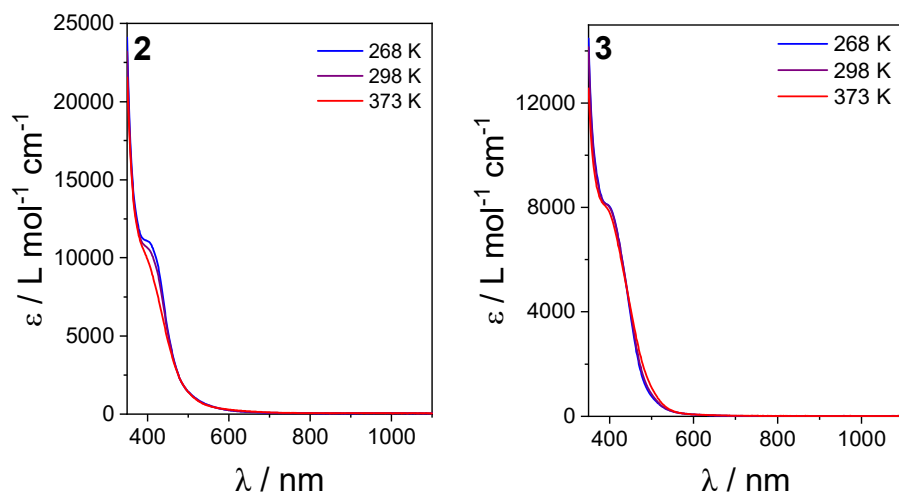

**Figure S30.** Variable temperature absorption spectra of **2** and **3** in BuCN at specified temperatures.

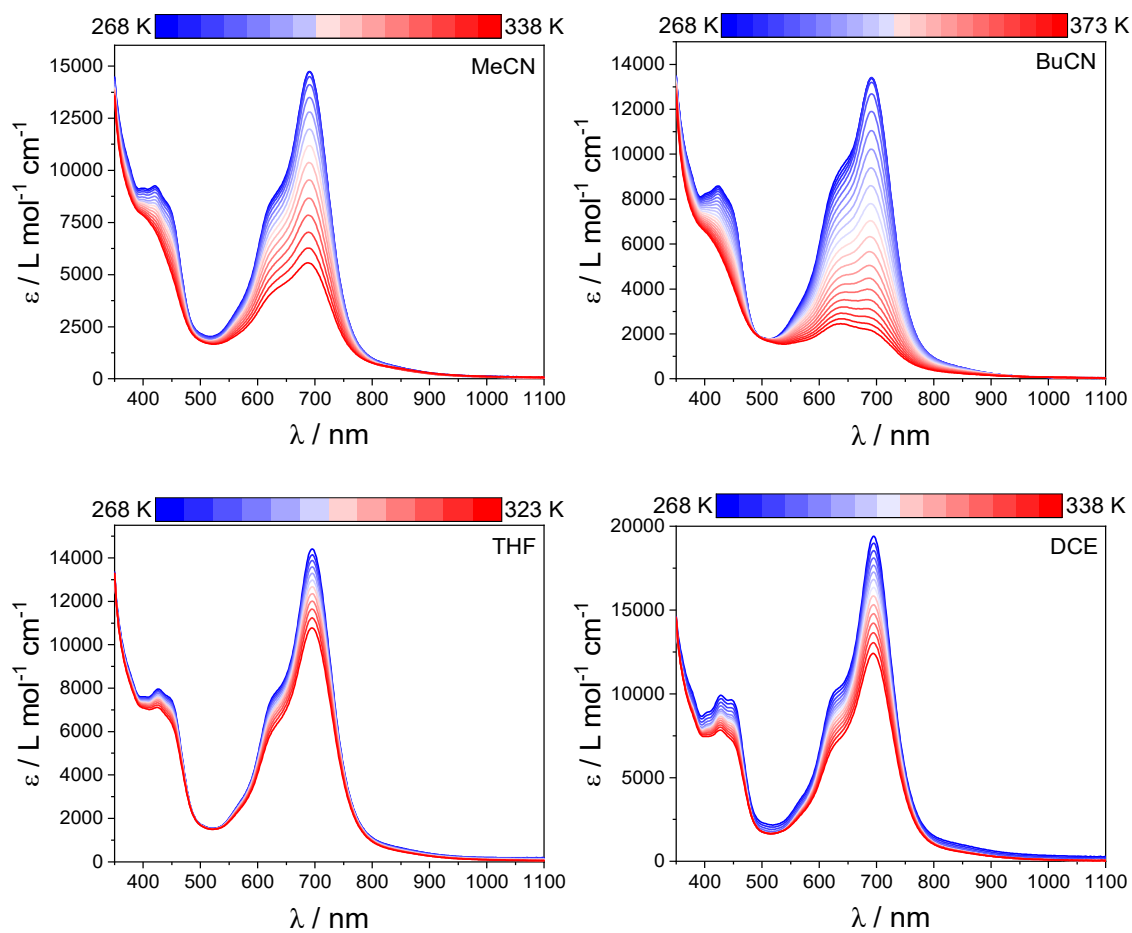

**Figure S31.** Variable temperature absorption spectra of **4** in MeCN (268 – 338 K), BuCN (268 – 373 K), THF (268 – 323 K), and DCE (268 – 338 K) in 5 K increments.

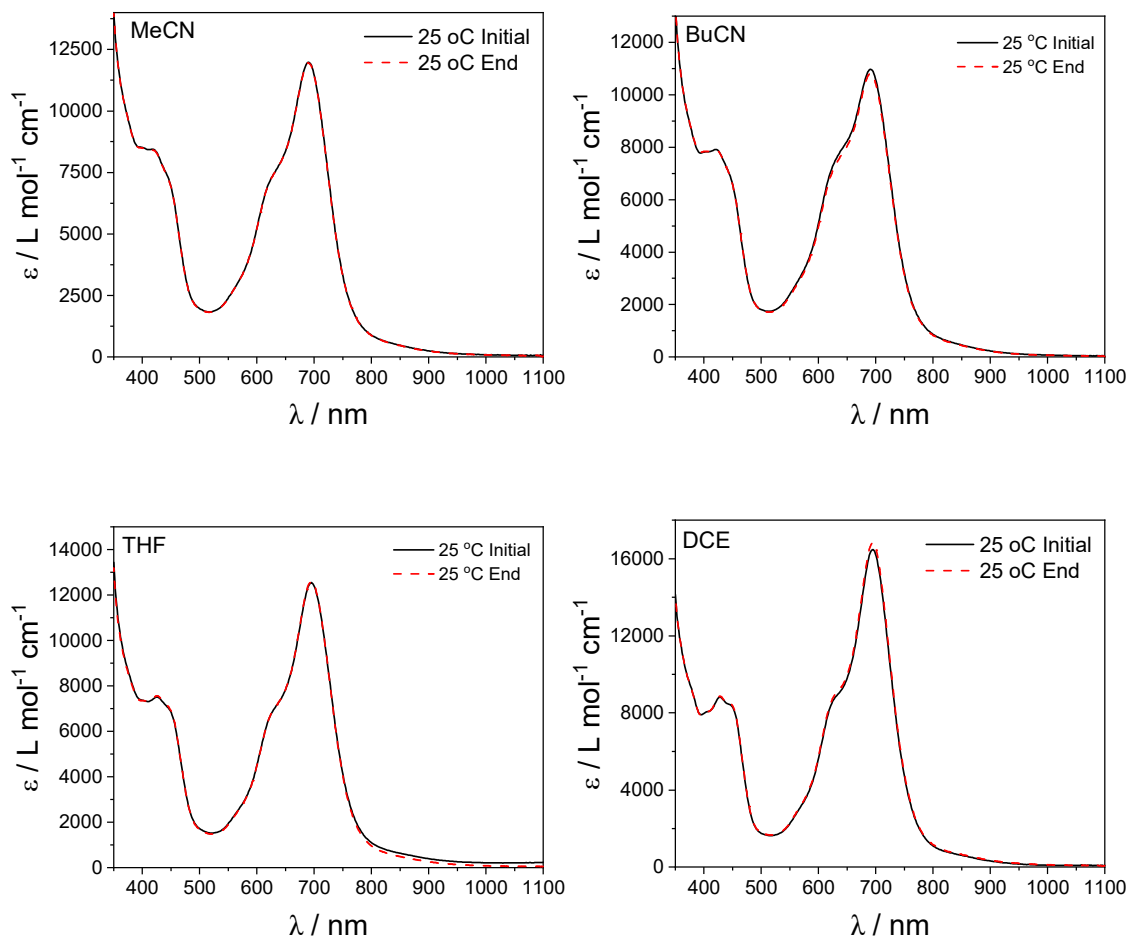

**Figure S32.** UV-Vis sample of **4** in MeCN, BuCN, THF and DCE at 298 K measured immediately following dissolution (black solid line) and after heating from 268 to 338 K (MeCN), 373 K (BuCN), 323 K (THF) or 338 K (DCE) (red dashed line).

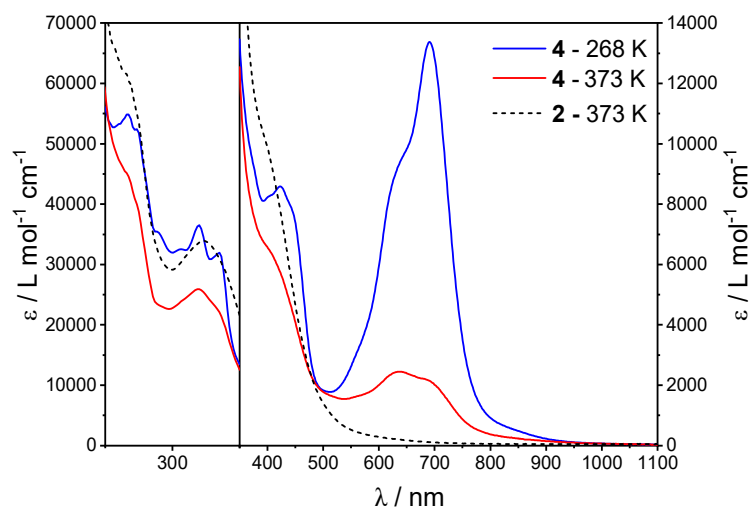

**Figure S33.** UV-Vis spectra of **4** at 268 and 373 K vs UV-Vis spectrum of **2** at 373 K in BuCN.

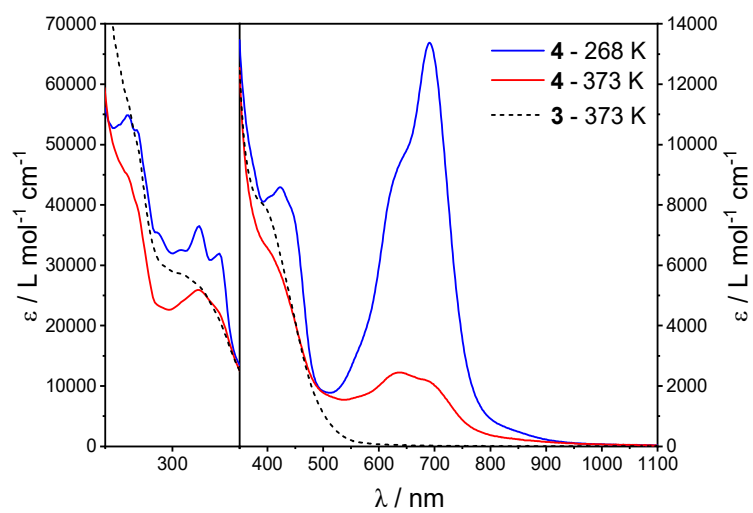

**Figure S34.** UV-Vis spectra of **4** at 268 and 373 K vs UV-Vis spectrum of **3** at 373 K in BuCN.

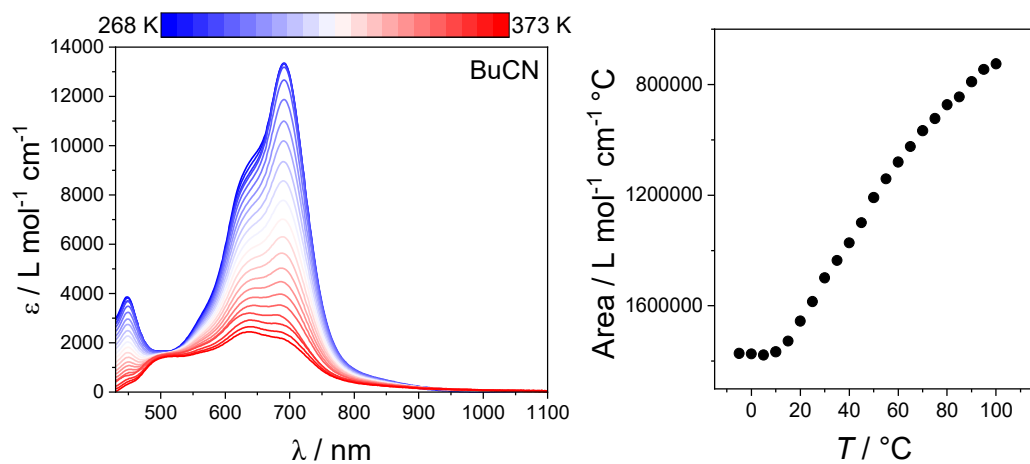

**Figure S35.** UV-Vis spectra of **4** between 268 – 373 K with subtraction of the UV-Vis spectra of **1** in BuCN at the same corresponding temperature (left). Plot of the relative area of the deconvoluted UV-Vis spectra of **4** (left in figure) vs temperature.

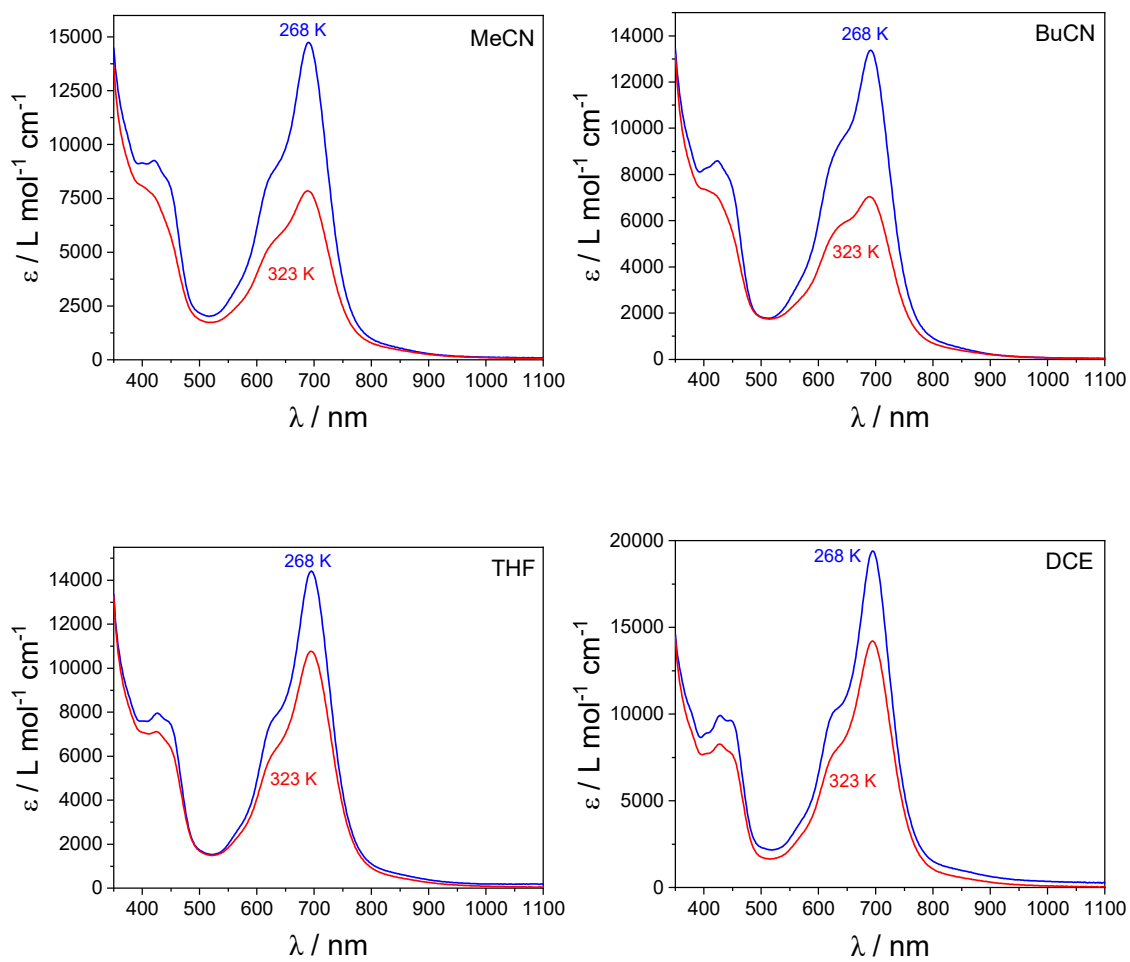

**Figure S36.** UV-vis spectra of **4** in MeCN, BuCN, THF, and DCE at 268 K (blue) and 323 K (red) highlighting degree of spectra change.

## Solution-State Magnetic Measurements

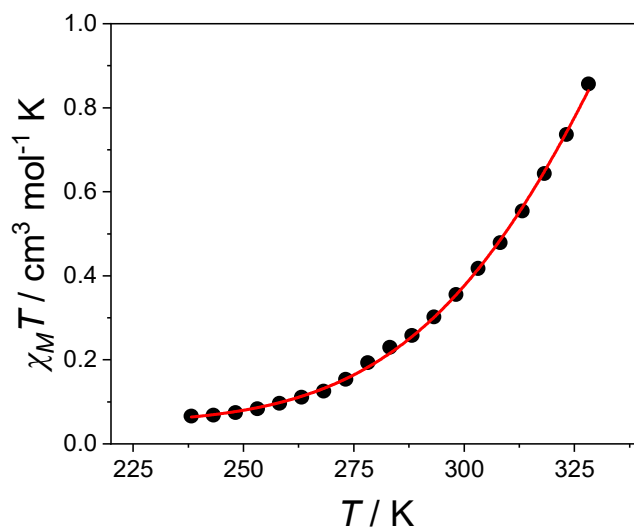

**Figure S37.** Plots of  $\chi_M T$  vs  $T$  for **4** in MeCN with a regular solution model fit (red line) ( $R^2 = 0.999$ ).



## Electrochemistry

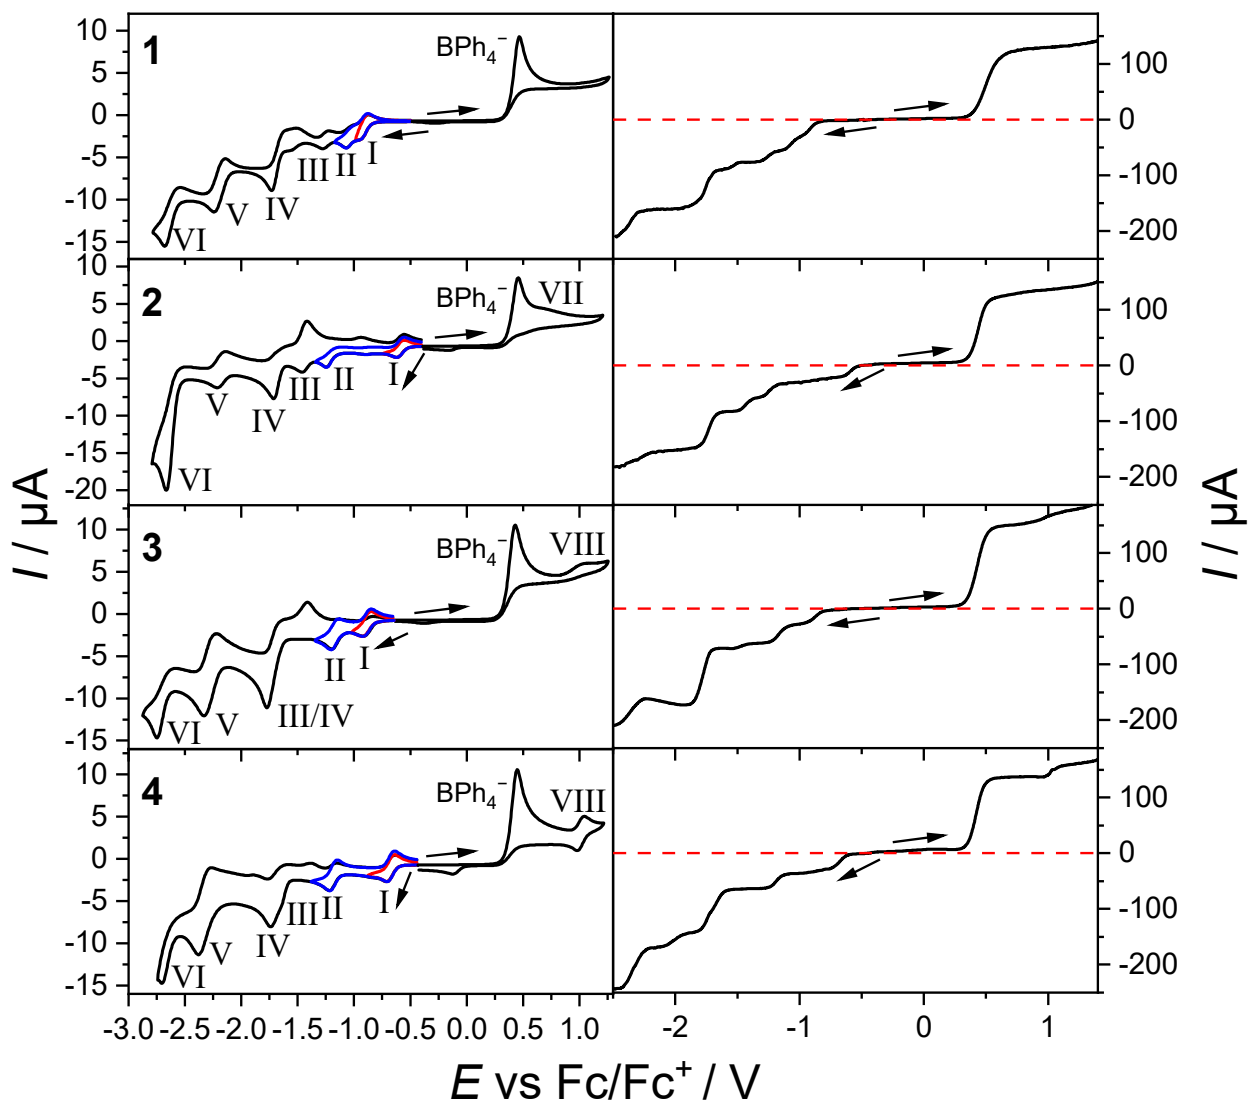

**Figure S38.** Cyclic voltammograms of MeCN solutions of compounds **1**, **2**, **3** and **4** (1.0 mM with 0.25 M  $\text{Bu}_4\text{NPF}_6$ ) obtained with a scan rate of  $100 \text{ mV s}^{-1}$  (left). Corresponding RDE voltammograms at a scan rate of  $50 \text{ mV s}^{-1}$  and a rotation rate of  $500 \text{ rotations min}^{-1}$  (right). Arrows indicate the starting point and direction of the scan.

## References

- 1 A. Cimino, F. Moscatelli, F. Ferretti, F. Ragaini, S. Germain, J. Hannedouche, E. Schulz, L. Luconi, A. Rossin and G. Giambastiani, *New J. Chem.*, 2016, **40**, 10285–10293.
- 2 D. Aragão, J. Aishima, H. Cherukuvada, R. Clarken, M. Clift, N. P. Cowieson, D. J. Ericsson, C. L. Gee, S. Macedo, N. Mudie, S. Panjekar, J. R. Price, A. Riboldi-Tunncliffe, R. Rostan, R. Williamson and T. T. Caradoc-Davies, *J. Synchrotron Radiat.*, 2018, **25**, 885–891.
- 3 N. P. Cowieson, D. Aragao, M. Clift, D. J. Ericsson, C. Gee, S. J. Harrop, N. Mudie, S. Panjekar, J. R. Price, A. Riboldi-Tunncliffe, R. Williamson and T. Caradoc-Davies, *J. Synchrotron. Radiat.*, 2015, **22**, 187–190.
- 4 Rigaku Oxford Diffraction. CrysAlisPro version 1.171.40.14a, Rigaku Corporation, Wroclaw (Poland), 2018.
- 5 G. M. Sheldrick, SADABS, University of Göttingen, Germany, 1996.
- 6 G. M. Sheldrick, *Acta Crystallogr., Sect. A: Found. Adv.*, 2015, **71**, 3–8.
- 7 G. M. Sheldrick, *Acta Crystallogr., Sect. C: Struct. Chem.*, 2015, **71**, 3–8.
- 8 O. V. Dolomanov, L. J. Bourhis, R. J. Gildea, J. A. K. K. Howard and H. Puschmann, *J. Appl. Crystallogr.*, 2009, **42**, 339–341.
- 9 P. van der Sluis and A. L. Spek, *Acta Crystallogr., Sect. A: Found. Adv.*, 1990, **46**, 194–201.
- 10 M. A. Hay, J. T. Janetzki, V. J. Kumar, R. W. Gable, R. Clérac, A. A. Starikova, P. J. Low and C. Boskovic, *Inorg. Chem.*, 2022, **61**, 17609–17622.
- 11 *Wissoft 2003*; Wissenschaftliche Elektronik GmbH: Ortenberg, Germany, 2010.
- 12 Lagarec, K.; Rancourt, D. G. *Recoil 1.05 – Mössbauer spectral analysis software for Windows*; Department of Physics, University of Ottawa, Canada, 1998.
- 13 D. F. Evans, *J. Chem. Soc.*, 1959, 2003–2005.
- 14 S. Brahma and R. L. Gardas, *J. Mol. Liq.*, 2018, **256**, 22–28.
- 15 S. O. Morgan and H. H. Lowry, *J. Phys. Chem.*, 1930, **34**, 2385–2432.
- 16 G. A. Bain and J. F. Berry, *J. Chem. Educ.*, 2008, **85**, 532.
- 17 J. Tao, J. P. Perdew, V. N. Staroverov and G. E. Scuseria, *Phys. Rev. Lett.*, 2003, **91**, 146401.
- 18 V. N. Staroverov, G. E. Scuseria, J. Tao and J. P. Perdew, *J. Chem. Phys.*, 2003, **119**, 12129–12137.
- 19 G. K. Gransbury, B. N. Livesay, J. T. Janetzki, M. A. Hay, R. W. Gable, M. P. Shores, A. Starikova and C. Boskovic, *J. Am. Chem. Soc.*, 2020, **142**, 10692–10704.
- 20 T. Tezgerevska, E. Rousset, R. W. Gable, G. N. L. Jameson, E. C. Sañudo, A. Starikova and C. Boskovic, *Dalton Trans.*, 2019, **48**, 11674–11689.
- 21 J. Cirera, M. Via-Nadal and E. Ruiz, *Inorg. Chem.*, 2018, **57**, 14097–14105.
- 22 O. S. Siig and K. P. Kepp, *J. Phys. Chem. A*, 2018, **122**, 4208–4217.
- 23 Y. Hitomi, M. Higuchi, H. Minami, T. Tanaka and T. Funabiki, *Chem. Commun.*, 2005, 1758–1760

- 24 J. T. Janetzki, M. G. Chegerev, G. K. Gransbury, R. W. Gable, J. K. Clegg, R. J. Mulder, G. N. L. Jameson, A. A. Starikova and C. Boskovic, *Inorg. Chem.*, 2023, **62**, 15719–15735.
- 25 M. G. Chegerev and A. A. Starikova, *Comput. Theor. Chem.*, 2022, **1211**, 113693.
- 26 J. Sirirak, D. Sertphon, W. Phonsri, P. Harding and D. J. Harding, *Int. J. Quantum Chem.*, 2017, **117**, 1–8.
- 27 M. Swart, *J. Chem. Theory. Comput.*, 2008, **4**, 2057–2066.
- 28 S. Llunell, M. Casanova, D. Cirera, J. Alemany and P. Alvarez, SHAPE 2.1, 2013.
- 29 S. Alvarez, D. Avnir, M. Llunell and M. Pinsky, *New J. Chem.*, 2002, **26**, 996–1009.
- 30 R. Ketkaew, Y. Tantirungrotechai, P. Harding, G. Chastanet, P. Guionneau, M. Marchivie and D. J. Harding, *Dalton Trans.*, 2021, **50**, 1086–1096.
- 31 P. H. C. Camargo, *J. Mater. Sci.*, 2017, **52**, 9959–9962.
- 32 I. D. Brown and D. Altermatt, *Acta Crystallogr., Sect. B: Struc. Sci., Cryst. Eng., Mat.*, 1985, **244**, 244–247.
- 33 N. F. Chilton, R. P. Anderson, L. D. Turner, A. Soncini and K. S. Murray, *J. Comput. Chem.*, 2013, **34**, 1164–1175.
- 34 V. L. Nadurata, M. A. Hay, J. T. Janetzki, G. K. Gransbury and C. Boskovic, *Dalton Trans.*, 2021, **50**, 16631–16646.
- 35 I. L. Fedushkin, A. A. Skatova, V. A. Chudakova, V. K. Cherkasov, G. K. Fukin and M. A. Lopatin, *Eur. J. Inorg. Chem.*, 2004, 388–393.
- 36 I. L. Fedushkin, A. A. Skatova, M. Hummert and H. Schumann, *Eur. J. Inorg. Chem.*, 2005, 1601–1608.
- 37 P. Robin and Melvin B. Day, *Adv. Inorg. Chem. Radiochem.*, 1967, **10**, 247–422.
- 38 D. M. D'Alessandro and F. R. Keene, *Chem. Soc. Rev.*, 2006, **35**, 424–440.
- 39 A. Arnold, T. J. Sherbow, R. I. Sayler, R. D. Britt, E. J. Thompson, M. T. Muñoz, J. C. Fettinger and L. A. Berben, *J. Am. Chem. Soc.*, 2019, **141**, 15792–15803.
- 40 K. Tahara, T. Kadowaki, J. Kikuchi, Y. Ozawa, S. Yoshimoto and M. Abe, *Bull. Chem. Soc. Jpn.*, 2018, **91**, 1630–1639.
- 41 Á. Moneo, G. C. Justino, M. F. N. N. Carvalho, M. C. Oliveira, A. M. M. Antunes, D. Bléger, S. Hecht and J. P. Telo, *J. Phys. Chem. A*, 2013, **117**, 14056–14064.
- 42 K. D. Demadis, C. M. Hartshorn and T. J. Meyer, *Chem. Rev.*, 2001, **101**, 2655–2685.
- 43 N. S. Hush, *Electrochim. Acta*, 1968, **13**, 1005–1023.
